# Supplementary material for: SARS-CoV-2 antibody responses post-vaccination in UK healthcare workers with pre-existing medical conditions: a cohort study
Source: PubMed Central journal article supplement — BMJ Open. 2022 Dec 1;12(12):e066766. doi: 10.1136/bmjopen-2022-066766 (PMC9716410; doi:10.1136/bmjopen-2022-066766), 2022-12-01
Supplement: bmjopen-2022-066766.draft_revisions.pdf [file bmjopen-2022-066766.draft_revisions.pdf]

# BMJ Open

BMJ Open is committed to open peer review. As part of this commitment we make the peer review history of every article we publish publicly available.

When an article is published we post the peer reviewers' comments and the authors' responses online. We also post the versions of the paper that were used during peer review. These are the versions that the peer review comments apply to.

The versions of the paper that follow are the versions that were submitted during the peer review process. They are not the versions of record or the final published versions. They should not be cited or distributed as the published version of this manuscript.

BMJ Open is an open access journal and the full, final, typeset and author-corrected version of record of the manuscript is available on our site with no access controls, subscription charges or pay-per-view fees (<http://bmjopen.bmj.com>).

If you have any questions on BMJ Open's open peer review process please email [info.bmjopen@bmj.com](mailto:info.bmjopen@bmj.com)

# BMJ Open

## SARS-CoV-2 antibody responses post-vaccination in healthcare workers with pre-existing medical conditions

|                               |                                                                                                                                                                                                                                                                                                                                                                                                                                                                                                                                                                                                                                                                                                                                                                                                                              |
|-------------------------------|------------------------------------------------------------------------------------------------------------------------------------------------------------------------------------------------------------------------------------------------------------------------------------------------------------------------------------------------------------------------------------------------------------------------------------------------------------------------------------------------------------------------------------------------------------------------------------------------------------------------------------------------------------------------------------------------------------------------------------------------------------------------------------------------------------------------------|
| Journal:                      | <i>BMJ Open</i>                                                                                                                                                                                                                                                                                                                                                                                                                                                                                                                                                                                                                                                                                                                                                                                                              |
| Manuscript ID                 | bmjopen-2022-066766                                                                                                                                                                                                                                                                                                                                                                                                                                                                                                                                                                                                                                                                                                                                                                                                          |
| Article Type:                 | Original research                                                                                                                                                                                                                                                                                                                                                                                                                                                                                                                                                                                                                                                                                                                                                                                                            |
| Date Submitted by the Author: | 19-Jul-2022                                                                                                                                                                                                                                                                                                                                                                                                                                                                                                                                                                                                                                                                                                                                                                                                                  |
| Complete List of Authors:     | Ward, Victoria; University of Oxford, Nuffield Department of Medicine; Oxford University Hospitals<br>Wei, Jia; University of Oxford, Nuffield Department of Medicine; University of Oxford Big Data Institute<br>Gordon, William; Oxford University Hospitals<br>Barnes, Eleanor; University of Oxford, Nuffield Department of Medicine; Oxford University Hospitals<br>Dunachie, Susie; University of Oxford, Nuffield Department of Medicine; Oxford University Hospitals<br>Jeffery, Katie; Oxford University Hospitals; University of Oxford, Radcliffe Department of Medicine<br>Eyre, David; Oxford University Hospitals; University of Oxford, Nuffield Department of Population Health<br>O'Donnell, Anne-Marie; University of Oxford, Nuffield Department of Population Health; Oxford Health NHS Foundation Trust |
| Keywords:                     | COVID-19, EPIDEMIOLOGY, OCCUPATIONAL & INDUSTRIAL MEDICINE                                                                                                                                                                                                                                                                                                                                                                                                                                                                                                                                                                                                                                                                                                                                                                   |
|                               |                                                                                                                                                                                                                                                                                                                                                                                                                                                                                                                                                                                                                                                                                                                                                                                                                              |

SCHOLARONE™  
Manuscripts

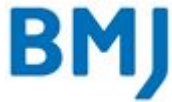

I, the Submitting Author has the right to grant and does grant on behalf of all authors of the Work (as defined in the below author licence), an exclusive licence and/or a non-exclusive licence for contributions from authors who are: i) UK Crown employees; ii) where BMJ has agreed a CC-BY licence shall apply, and/or iii) in accordance with the terms applicable for US Federal Government officers or employees acting as part of their official duties; on a worldwide, perpetual, irrevocable, royalty-free basis to BMJ Publishing Group Ltd ("BMJ") its licensees and where the relevant Journal is co-owned by BMJ to the co-owners of the Journal, to publish the Work in this journal and any other BMJ products and to exploit all rights, as set out in our [licence](#).

The Submitting Author accepts and understands that any supply made under these terms is made by BMJ to the Submitting Author unless you are acting as an employee on behalf of your employer or a postgraduate student of an affiliated institution which is paying any applicable article publishing charge ("APC") for Open Access articles. Where the Submitting Author wishes to make the Work available on an Open Access basis (and intends to pay the relevant APC), the terms of reuse of such Open Access shall be governed by a Creative Commons licence – details of these licences and which [Creative Commons](#) licence will apply to this Work are set out in our licence referred to above.

Other than as permitted in any relevant BMJ Author's Self Archiving Policies, I confirm this Work has not been accepted for publication elsewhere, is not being considered for publication elsewhere and does not duplicate material already published. I confirm all authors consent to publication of this Work and authorise the granting of this licence.

# SARS-CoV-2 antibody responses post-vaccination in healthcare workers with pre-existing medical conditions

Victoria Ward<sup>1,2\*</sup>, Jia Wei<sup>1,3\*</sup>, William Gordon<sup>2</sup>, Eleanor Barnes<sup>1,2,6</sup>, Susanna J Dunachie<sup>1,2</sup>, Katie Jeffery<sup>2,4</sup>, David W Eyre<sup>2,3,5,6,7§</sup>, Anne-Marie O'Donnell<sup>5,8§</sup>

\* contributed equally

§ contributed equally

<sup>1</sup> Nuffield Department of Medicine, University of Oxford, Oxford, UK

<sup>2</sup> Oxford University Hospitals, Oxford, UK

<sup>3</sup> Big Data Institute, University of Oxford, Oxford, UK

<sup>4</sup> Radcliffe Department of Medicine, University of Oxford, Oxford, UK

<sup>5</sup> Nuffield Department of Population Health, University of Oxford, Oxford, UK

<sup>6</sup> NIHR Oxford Biomedical Research Centre, University of Oxford, Oxford, UK

<sup>7</sup> NIHR Health Protection Research Unit in Healthcare Associated Infections and Antimicrobial Resistance at University of Oxford in partnership with Public Health England, Oxford, UK

<sup>8</sup> Oxford Health NHS Foundation Trust, Oxford, UK

Corresponding author:

Dr David Eyre,

david.eyre@bdi.ox.ac.uk

+44 (0)1865 221081

Microbiology Department, John Radcliffe Hospital, Headley Way, Oxford, OX3 9DU

## Abstract

**Objectives:** To examine antibody responses after the second vaccination in healthcare workers (HCWs) with underlying health conditions.

**Methods:** We examined the peak anti-spike IgG responses after the second vaccination in 1,635 UK HCWs and associations with underlying health conditions and the estimated risk of severe COVID using an occupational health risk assessment tool. We used univariable and multivariable linear regression models to investigate associations between antibody levels and demographics (age, sex, ethnicity), health care role, body mass index, underlying health conditions, vaccination status, prior infection, and the Association of Local Authority Medical Advisors COVID-age risk score.

**Results:** 1,635 HCWs had anti-spike IgG measurements 14-84 days post second vaccination and data on any underlying health conditions. Only 5 HCWs (0.3%), all on immunosuppressive treatment, (including 4 organ transplant recipients), did not seroconvert after second vaccination. Antibody levels were independently lower with older age, diabetes, immunosuppression, respiratory disorders other than asthma, and markedly so in organ transplant recipients. Levels were independently lower in ChAdOx1 vs. BNT162b2 recipients and higher following previous infection. HCWs with 'very high' COVID-age risk scores had lower median antibody levels than those with 'low', 'medium' or 'high' risk scores; 4,379 AU/ml, compared with 12,337 AU/ml, 9,430 AU/ml, and 10,524 AU/ml respectively.

**Conclusions:** Two vaccine doses are effective in generating antibody responses among HCWs, including those with a high occupational risk. However, HCWs with underlying health conditions, especially diabetes, immunosuppression, and organ transplant, had lower antibody levels, and vaccine response monitoring may be needed.

### Strengths and limitations of this study

- The study focuses on antibody levels post vaccination in healthcare workers (HCWs) with underlying health conditions.
- The study examines the association between the Association of Local Authority Medical Advisors COVID-age tool and vaccine response.
- The study only examines the peak anti-spike IgG levels after the second vaccination and does not assess antibody waning longitudinally.

- The study is not widely generalizable given the cohort is predominantly working-age HCWs.

For peer review only

1  
2  
3 Word count: 3270  
4  
5  
6  
7

## 8 Introduction 9

10 Healthcare workers (HCWs) have played a central role in the response to the severe acute  
11 respiratory syndrome coronavirus 2 (SARS-CoV-2) global pandemic. In many settings HCWs have  
12 been shown to be at an increased risk of SARS-CoV-2 infection, with risks relating both to proximity  
13 to infected patients and also to increased contact with colleagues compared with those working  
14 from home<sup>1-3</sup>.  
15  
16  
17  
18

19 Several interventions have been made to protect HCWs, including risk assessments, improved access  
20 to personal protective equipment (PPE) and training, better understanding of effective PPE selection,  
21 and modifications to working environments including social distancing and improved ventilation.  
22 One widely used UK tool that has been developed to assist in SARS-CoV-2 occupational health risk  
23 assessments is the Association of Local Authority Medical Advisors (ALAMA) COVID-age score<sup>4</sup>,  
24 which uses demographic and medical history factors to estimate the risk of death if a HCW were to  
25 become infected. For those at the highest risk, restriction of patient contact or alternative working  
26 patterns may be recommended.  
27  
28  
29  
30  
31  
32

33 Additionally, multiple vaccines have been developed that show good protection against COVID-19  
34 infection, hospitalisation, and death<sup>5-8</sup>, including in studies specifically looking at HCWs. Vaccination  
35 therefore plays an important role in facilitating those HCWs at higher risk of adverse outcomes from  
36 infection to remain in their usual work. Some HCWs, however, may not generate protective  
37 immunity following vaccination because of underlying medical conditions, especially those at the  
38 highest risk of adverse outcomes.  
39  
40  
41  
42  
43

44 One potential way to assess which HCWs have responded to vaccination is to look at their antibody  
45 levels post vaccination. Various studies have examined antibody responses in HCWs, including  
46 looking at the duration, magnitude, and response trajectories<sup>9-12</sup>, to understand the level of  
47 protection induced from vaccination, and its association with age, sex, and ethnicity<sup>13</sup>. However, few  
48 studies have examined the antibody responses in HCWs with underlying comorbidities. In particular,  
49 the association between estimated vulnerability of HCWs and antibody response to vaccination has  
50 not been studied.  
51  
52  
53  
54  
55

56 Here we report findings from a retrospective observational study looking at anti-spike IgG antibody  
57 responses post second COVID-19 vaccination in HCWs with underlying health conditions, specifically  
58  
59  
60

1  
2  
3 focusing on the association between peak antibody levels with the pre-existing underlying health  
4 conditions.  
5  
6  
7  
8  
9

## 10 Methods

### 11 Participants and settings

12  
13 Oxford University Hospitals (OUH) consists of 4 teaching hospitals in Oxfordshire UK, providing acute  
14 and specialist services and employing 13,500 staff. OUH offered vaccination to all HCWs. The  
15 programme began on 8-December-2020, initially prioritising those at highest risk of severe COVID,  
16 starting with the Pfizer-BioNTech BNT162b2 vaccine, with Oxford-AstraZeneca ChAdOx1 nCoV-19  
17 added from 4 January 2021 and predominately provided to all staff at one acute hospital. Some  
18 HCWs received the Oxford-AstraZeneca vaccine in clinical trials beginning 23 April 2020 and were  
19 included following unblinding if receiving active vaccine.  
20  
21  
22  
23  
24  
25

26  
27 OUH has offered SARS-CoV-2 testing to all symptomatic and asymptomatic staff. SARS-CoV-2 PCR  
28 testing of combined nasal and oropharyngeal swabs for symptomatic staff (those with a new  
29 persistent cough, temperature  $\geq 37.8^{\circ}\text{C}$ , anosmia, or ageusia) was offered from 27 March 2020  
30 onwards. Asymptomatic HCWs were invited to participate in voluntary nasal and oropharyngeal  
31 swab PCR testing and serologic testing from 23 April 2020 to 30 June 2021, as previously  
32 described<sup>9,14</sup>. All swabbing was performed by trained staff rather than self-administered. Additional  
33 serological testing of HCWs was undertaken by the Occupational Health department based on  
34 clinical assessment.  
35  
36  
37  
38  
39

40  
41 For occupational health purposes, all HCWs were asked to complete an individual COVID-19 risk  
42 assessment and those with underlying health conditions had more detailed risk assessments  
43 undertaken by the Occupational Health department. Staff members completed an online  
44 questionnaire about their age, sex, ethnicity, body mass index (BMI), underlying health conditions,  
45 smoking and pregnancy status, vaccination details, job role and location. COVID-age risk scores<sup>4</sup>  
46 were calculated based on this information to enable an appropriate risk assessment to be made by  
47 the Occupational Health team.  
48  
49  
50  
51  
52

### 53 Laboratory tests

54  
55 Anti-trimeric spike IgG antibody levels were measured using the Abbott SARS-CoV-2 IgG II Quant  
56 antibody test (Abbott, Maidenhead, UK) targeting the spike receptor binding domain (RBD), with the  
57 cut-off of  $\geq 50$  AU/mL reported as positive and a linear quantification of detected results from 50 to  
58  
59  
60



1  
2  
3 40,000 AU/mL<sup>15</sup>. Anti-spike IgG levels above 40,000 AU/ml were truncated at 40,000 AU/ml. The  
4 conversion between AU/ml and BAU/mL provided by the manufacturer is: 7 AU/ml= 1 BAU/mL. Pre-  
5 vaccination anti-nucleocapsid IgG levels were measured using the Abbott Architect i2000  
6 chemiluminescent microparticle immunoassay (CMIA; Abbott, Maidenhead, UK), with antibody  
7 levels  $\geq 1.40$  manufacturer's arbitrary units reported as positive. Pre-vaccination anti-trimeric-spike  
8 IgG levels were measured using an enzyme-linked immunosorbent assay (ELISA) developed by the  
9 University of Oxford<sup>16</sup>, with  $\geq 8$  million units reported as positive.

15 PCR was performed using the Public Health England SARS-CoV-2 assay (targeting the RdRp gene) or  
16 one of five commercial assays: Abbott RealTime (targeting RdRp and N genes; Abbott, Maidenhead,  
17 UK), Altona RealStar (targeting E and S genes; Altona Diagnostics, Liverpool, UK), Cepheid Xpert®  
18 Xpress SARS-CoV-2 (targeting N2 and E; Cepheid, California, USA), BioFire® Respiratory 2.1 (RP2.1)  
19 panel with SARS-CoV-2 (targeting ORF1ab and ORF8; Biofire diagnostics, Utah, USA), Thermo Fisher  
20 TaqPath assay (targeting S and N genes, and ORF1ab; Thermo Fisher, Abingdon, UK) or using the ABI  
21 7500 platform (Thermo Fisher, Abingdon, UK) with the US Centers for Disease Control and  
22 Prevention Diagnostic Panel of two probes targeting the N gene.

### 29 **Statistical analysis**

31 We included HCWs aged 17-77 years who completed an occupational health risk assessment,  
32 received a two-vaccination course, and had antibody measurements after their second vaccination.  
33 The vaccination type was divided into a homologous ChAdOx1 course, homologous BNT162b2  
34 course, and other vaccine types or mixed vaccination.

35 HCW's sex (grouped into male, female and non-disclosed), ethnicity (White, Asian, Black, Mixed,  
36 Other, and not stated), BMI (<16, 16-24.9, 25-29.9, 30-34.9, 35-39.9 and 40+) were included. Job role  
37 was grouped into nurse or healthcare assistant, doctor, administrative staff, physical, occupational,  
38 or speech therapist, laboratory staff, porter or domestic worker, medical or nursing student, or  
39 'other', which included security, estates, catering staff, pharmacists, midwives, and other allied  
40 healthcare professionals.

41 Medical conditions and other potential risk factors included in the analysis were smoking and  
42 pregnancy status, and whether each HCW had asthma, hypertension, a thyroid disorder excluding  
43 malignancy, diabetes, immunosuppression, psoriasis, heart disease, a non-haematological  
44 malignancy, a rheumatological disorder, a respiratory disease other than asthma, a haematological  
45 disease excluding malignancy, liver disease, a neurological disorder, chronic kidney disease stage 3, 4  
46 or 5, lupus, a splenic disorder excluding traumatic splenectomy, a haematological malignancy, and  
47  
48  
49  
50  
51  
52  
53  
54  
55  
56  
57  
58  
59  
60

1  
2  
3 an organ transplant. Prior infection was defined as having had a positive PCR result or a positive anti-  
4 spike antibody result or a positive anti-nucleocapsid antibody result before the first vaccination  
5 dose.  
6  
7

8  
9 The ALAMA COVID-age risk score was calculated based on age, sex, ethnicity, and presence of  
10 comorbidities. It estimates the probability of death should infection occur in the absence of  
11 vaccination or previous infection. A score  $\geq 85$  indicates very high vulnerability, 70-84 high  
12 vulnerability, 50-69 moderate vulnerability, and  $< 50$  low vulnerability. Details of the calculation  
13 formula and methods can be found online<sup>4</sup>.  
14  
15  
16

17  
18 We used the peak antibody level 14-84 days post second vaccination as the outcome. Antibody  
19 response was divided into three groups: high response (peak anti-spike IgG level  $> 700$  AU/ml,  
20 converted from 100 BAU/mL which is associated with 67% protection against Delta infection<sup>17</sup>), low  
21 response (50-700 AU/ml), and no response ( $< 50$  AU/ml).  
22  
23  
24

25  
26 Antibody measurements after breakthrough infections post first vaccination were excluded from the  
27 analysis: 26 HCWs had evidence of infection at least 14 days after their first vaccination but prior to  
28 their second vaccination, and 37 HCWs had evidence of infection at least 14 days after their second  
29 vaccination. We first used the Kruskal-Wallis rank test to compare the outcome by different  
30 covariate groups. We then built univariable and multivariable linear regression models to examine  
31 the association between the outcome on the  $\log_{10}$  scale and demographics (age, sex, ethnicity),  
32 health care role, BMI, underlying health conditions, vaccination status, prior infection, and COVID-  
33 age risk score. Age was truncated at the 2.5<sup>th</sup> and 97.5<sup>th</sup> percentile to avoid undue outlier influence  
34 and modelled with and without natural cubic splines to test for the non-linear effects. For the  
35 multivariable model, backward elimination was used and the model with the lowest Akaike  
36 information criteria (AIC) was selected. COVID-age score was not included in the multivariable model  
37 as it is based on other factors already included in the model.  
38  
39  
40  
41  
42  
43  
44  
45

46 All analyses were performed in R (version 4.1), using the following packages: tidyverse (version  
47 1.3.1), splines (version 4.0.5), and stats (version 4.0.5).  
48  
49

### 50 **Patient and public involvement**

51  
52 No patients and public were involved in the study design, interpretation or write up of the results.  
53  
54  
55  
56  
57  
58  
59  
60

## Results

A total of 5,968 HCWs had serological data available between 9 April 2020 and 26 August 2021, among which 1,635 HCWs had anti-spike IgG measurements 14-84 days post second vaccination and provided data on any underlying health conditions; these HCWs were included in the study. The median (IQR) [range] age was 46 (33-56) [17-77]. 1,344 (82.2%) were female, 1,169 (71.5%) were of white ethnicity, and 779 (47.6%) worked in a nursing or health-care assistant role. 872 (53.3%) did not have any underlying medical condition. The proportion reporting each condition ranged from 0.2% to 19.3%, with asthma being the most common comorbidity. 286 (17.5%) HCWs had evidence of infection prior to their first vaccination. The median (IQR) [range] COVID-age score was 50 (35-59) [16-124], with 120 (7.5%) and 22 (1.4%) HCWs falling in the 'High' and 'Very high' risk groups, respectively. 1,234 (75.5%) and 387 (23.7%) HCWs received two BNT162b2 and ChAdOx1 vaccinations, respectively, and 13 HCWs (0.8%) received other combinations, including mRNA-1273 (**Table 1, 2**). The characteristics were generally similar to the larger group of 5,968 HCWs with serological data, so the cohort included in the analysis should be representative (**Table S1**).

Among 1,635 HCWs, the median (IQR) peak anti-spike binding antibody level 14-84 days post second vaccination was 10,763 (3,925-22,017) AU/ml. The distribution of peak antibody levels is shown in **Figure S1**. Observed antibody levels were different across age groups, health care roles, vaccination types, with or without evidence of prior infection, and COVID-age scores ( $p < 0.001$ ). HCWs with 'Very high' vulnerability according to COVID-age scores had the lowest median level of 4,379 AU/ml, compared with 12,337 AU/ml, 9,430 AU/ml, and 10,524 AU/ml in the 'Low', 'Moderate', and 'High' vulnerability groups (**Table 1, Figure 1a**). HCWs with medical conditions and other risk factors had lower median antibody levels than those without (9,637 AU/ml vs. 11,681 AU/ml,  $p = 0.009$ ); specifically, antibody levels were lower in smokers (7,588 AU/ml,  $p = 0.003$ ), those with hypertension (8,770 AU/ml,  $p = 0.01$ ), diabetes (8,748 AU/ml,  $p = 0.04$ ), immunosuppression (7,451 AU/ml,  $p = 0.002$ ), a respiratory disease other than asthma (6,993 AU/ml,  $p = 0.01$ ), and those who had an organ transplant (11 AU/ml,  $p < 0.001$ ) (**Table 2, Figure 1b**). There was no evidence of an association between pregnancy and antibody levels (14,684 AU/ml,  $p = 0.6$ ).

|                                   | Total (n=1,635) | Peak antibody levels >700 AU/ml (n=1,555) | Peak antibody levels 50-700 AU/ml (n=75) | Peak antibody levels <50 AU/ml (n=5) | Peak antibody levels 14-84 days post second vaccination (AU/ml) |                |                  |
|-----------------------------------|-----------------|-------------------------------------------|------------------------------------------|--------------------------------------|-----------------------------------------------------------------|----------------|------------------|
|                                   |                 |                                           |                                          |                                      | Median                                                          | IQR            | p value          |
| <b>Age (years)</b>                |                 |                                           |                                          |                                      |                                                                 |                |                  |
| <b>Median</b>                     | 46              | 46                                        | 49                                       | 34                                   | (Overall) 10,763                                                | 3,925-22,017   |                  |
| <b>Q1, Q3</b>                     | 33, 56          | 33, 56                                    | 36, 56                                   | 33, 43                               |                                                                 |                |                  |
| <b>Age group</b>                  |                 |                                           |                                          |                                      |                                                                 |                |                  |
| <b>17-34</b>                      | 457 (100.0%)    | 439 (96.1%)                               | 15 (3.3%)                                | 3 (0.7%)                             | 14,668                                                          | 5,359-25,801   | <b>&lt;0.001</b> |
| <b>35-54</b>                      | 723 (100.0%)    | 682 (94.3%)                               | 39 (5.4%)                                | 2 (0.3%)                             | 10,153                                                          | 3,773-20,578   |                  |
| <b>55-77</b>                      | 455 (100.0%)    | 434 (95.4%)                               | 21 (4.6%)                                | 0 (0.0%)                             | 9,328                                                           | 3,461-19,046   |                  |
| <b>Sex</b>                        |                 |                                           |                                          |                                      |                                                                 |                |                  |
| <b>Female</b>                     | 1,344 (100.0%)  | 1,271 (94.6%)                             | 68 (5.1%)                                | 5 (0.4%)                             | 10,779                                                          | 3,856 – 22,541 | 0.7              |
| <b>Male</b>                       | 290 (100.0%)    | 283 (97.6%)                               | 7 (2.4%)                                 | 0 (0.0%)                             | 10,710                                                          | 4,524 – 19,026 |                  |
| <b>Non-disclosed</b>              | 1 (100.0%)      | 1 (100.0%)                                | 0 (0.0%)                                 | 0 (0.0%)                             | 5,438                                                           |                |                  |
| <b>Ethnicity</b>                  |                 |                                           |                                          |                                      |                                                                 |                |                  |
| <b>White</b>                      | 1,169 (100.0%)  | 1,110 (95.0%)                             | 56 (4.8%)                                | 3 (0.3%)                             | 10,971                                                          | 3,907 – 22,009 | 0.3              |
| <b>Asian</b>                      | 304 (100.0%)    | 290 (95.4%)                               | 14 (4.6%)                                | 0 (0.0%)                             | 10,433                                                          | 4,180 – 21,829 |                  |
| <b>Black</b>                      | 50 (100.0%)     | 45 (90.0%)                                | 4 (8.0%)                                 | 1 (2.0%)                             | 7,081                                                           | 2,104 – 14,388 |                  |
| <b>Mixed</b>                      | 36 (100.0%)     | 36 (100.0%)                               | 0 (0.0%)                                 | 0 (0.0%)                             | 10,725                                                          | 4,573 – 29,932 |                  |
| <b>Other</b>                      | 55 (100.0%)     | 53 (96.4%)                                | 1 (1.8%)                                 | 1 (1.8%)                             | 8,581                                                           | 4,703 – 20,589 |                  |
| <b>Not stated</b>                 | 21 (100.0%)     | 21 (100.0%)                               | 0 (0.0%)                                 | 0 (0.0%)                             | 15,786                                                          | 5,686 – 25,064 |                  |
| <b>Role</b>                       |                 |                                           |                                          |                                      |                                                                 |                | <b>&lt;0.001</b> |
| <b>Administrative Staff</b>       | 245 (100.0%)    | 236 (96.3%)                               | 8 (3.3%)                                 | 1 (0.4%)                             | 11,653                                                          | 5,660 – 15,013 |                  |
| <b>Doctor</b>                     | 106 (100.0%)    | 102 (96.2%)                               | 4 (3.8%)                                 | 0 (0.0%)                             | 12,003                                                          | 6,677 – 22,113 |                  |
| <b>Laboratory Staff</b>           | 61 (100.0%)     | 58 (95.1%)                                | 2 (3.3%)                                 | 1 (1.6%)                             | 20,279                                                          | 8,790 – 31,137 |                  |
| <b>Medical or nursing Student</b> | 12 (100.0%)     | 12 (100.0%)                               | 0 (0.0%)                                 | 0 (0.0%)                             | 7,933                                                           | 6,061 – 20,103 |                  |
| <b>Nurse/HCA</b>                  | 779 (100.0%)    | 737 (94.6%)                               | 39 (5.0%)                                | 3 (0.4%)                             | 10,844                                                          | 3,897 – 21,515 |                  |

|                                                   |                |               |            |          |        |                  |
|---------------------------------------------------|----------------|---------------|------------|----------|--------|------------------|
| <b>Other</b>                                      | 331 (100.0%)   | 314 (94.9%)   | 17 (5.1%)  | 0 (0.0%) | 9,208  | 2,533 – 20,284   |
| <b>Porter or domestic worker</b>                  | 31 (100.0%)    | 27 (87.1%)    | 4 (12.9%)  | 0 (0.0%) | 8,476  | 1,533 – 15,644   |
| <b>OT/PT/SLT</b>                                  | 70 (100.0%)    | 69 (98.6%)    | 1 (1.4%)   | 0 (0.0%) | 11,849 | 6,021 – 24,371   |
| <b>BMI</b>                                        |                |               |            |          |        | <b>0.3</b>       |
| <b>&lt;16</b>                                     | 3 (100.0%)     | 2 (66.7%)     | 1 (33.3%)  | 0 (0.0%) | 17,716 | 9,195 – 18,471   |
| <b>16-24.9</b>                                    | 698 (100.0%)   | 667 (95.6%)   | 28 (4.0%)  | 3 (0.4%) | 11,587 | 4,186 – 22,134   |
| <b>25-29.9</b>                                    | 517 (100.0%)   | 491 (95.0%)   | 24 (4.6%)  | 2 (0.4%) | 10,169 | 3,404 – 19,046   |
| <b>30-34.9</b>                                    | 261 (100.0%)   | 247 (94.6%)   | 14 (5.4%)  | 0 (0.0%) | 10,149 | 4,318 – 24,585   |
| <b>35-39.9</b>                                    | 85 (100.0%)    | 81 (95.3%)    | 4 (4.7%)   | 0 (0.0%) | 10,743 | 4,534 – 27,281   |
| <b>&gt;40</b>                                     | 71 (100.0%)    | 67 (94.4%)    | 4 (5.6%)   | 0 (0.0%) | 11,199 | 5,877 – 28,260   |
| <b>Vaccine combination</b>                        |                |               |            |          |        | <b>&lt;0.001</b> |
| <b>ChAdOx1/ChAdOx1</b>                            | 387 (100.0%)   | 315 (81.4%)   | 70 (18.1%) | 2 (0.5%) | 1,603  | 879 – 3,521      |
| <b>BNT162b2/BNT162b2</b>                          | 1,234 (100.0%) | 1,227 (99.4%) | 4 (0.3%)   | 3 (0.2%) | 14,824 | 8,432 – 25,853   |
| <b>Other</b>                                      | 13 (100.0%)    | 13 (100.0%)   | 1 (0.0%)   | 0 (0.0%) | 6,993  | 4,693 – 13,212   |
| <b>Evidence of Covid-19 infection at baseline</b> |                |               |            |          |        | <b>&lt;0.001</b> |
| <b>No</b>                                         | 1,349 (100.0%) | 1,269 (94.1%) | 75 (5.6%)  | 5 (0.4%) | 9,960  | 3,302-20,056     |
| <b>Yes</b>                                        | 286 (100.0%)   | 286 (100.0%)  | 0 (0.0%)   | 0 (0.0%) | 17,227 | 7,111 – 28,277   |
| <b>COVID-age score groups</b>                     |                |               |            |          |        | <b>&lt;0.001</b> |
| <b>Low</b>                                        | 769 (100.0%)   | 737 (95.8%)   | 32 (4.2%)  | 0 (0.0%) | 12,337 | 4,634-23,170     |
| <b>Medium</b>                                     | 696 (100.0%)   | 659 (94.7%)   | 35 (5.0%)  | 2 (0.3%) | 9,430  | 3,693-19,302     |
| <b>High</b>                                       | 120 (100.0%)   | 114 (95.0%)   | 5 (4.2%)   | 1 (0.8%) | 10,524 | 3,106-23,939     |
| <b>Very high</b>                                  | 22 (100.0%)    | 17 (77.3%)    | 3 (13.6%)  | 2 (9.1%) | 4,379  | 889-11,214       |
| <b>COVID-age score</b>                            |                |               |            |          |        |                  |
| <b>Median</b>                                     | 50             | 50            | 53         | 76       |        |                  |
| <b>Q1, Q3</b>                                     | 35, 59         | 35, 60        | 36, 57     | 54, 85   |        |                  |

**Table 1. Characteristics of the study cohort according to the peak anti-spike IgG levels post-second vaccination.** Other for vaccine included mRNA-1273 and other vaccine combinations. OT/PT/SLT: occupational therapist, physiotherapist, and speech and language therapist. HCA: healthcare assistant.

|                                                      | Total (n=1,635) | Peak antibody levels >700 AU/ml (n=1,555) | Peak antibody levels 50-700 AU/ml (n=75) | Peak antibody levels <50 AU/ml (n=5) | Peak antibody levels 14-84 days post second vaccination (AU/ml) |                |              |
|------------------------------------------------------|-----------------|-------------------------------------------|------------------------------------------|--------------------------------------|-----------------------------------------------------------------|----------------|--------------|
|                                                      |                 |                                           |                                          |                                      | Median                                                          | IQR            | p value      |
| <b>Comorbidity</b>                                   |                 |                                           |                                          |                                      |                                                                 |                | <b>0.009</b> |
| <b>No</b>                                            | 872 (100.0%)    | 830 (95.2%)                               | 42 (4.8%)                                | 0 (0.0%)                             | 11,681                                                          | 4,362 – 23,299 |              |
| <b>Yes</b>                                           | 763 (100.0%)    | 725 (95.0%)                               | 33 (4.3%)                                | 5 (0.7%)                             | 9,637                                                           | 3,493-19,750   |              |
| <b>Smoking</b>                                       | 106 (100.0%)    | 99 (93.4%)                                | 7 (6.6%)                                 | 0 (0.0%)                             | 7,588                                                           | 1,828 – 19,639 | <b>0.003</b> |
| <b>Pregnant</b>                                      | 23 (100.0%)     | 23 (100.0%)                               | 0 (0.0%)                                 | 0 (0.0%)                             | 14,684                                                          | 8,199 – 19,453 | 0.6          |
| <b>Asthma</b>                                        | 316 (100.0%)    | 300 (94.9%)                               | 16 (5.1%)                                | 0 (0.0%)                             | 10,161                                                          | 4,296 – 19,559 | 0.2          |
| <b>Hypertension</b>                                  | 176 (100.0%)    | 168 (95.5%)                               | 8 (4.5%)                                 | 0 (0.0%)                             | 8,770                                                           | 3,272 - 18,746 | <b>0.01</b>  |
| <b>Thyroid disorder (excluding malignancy)</b>       | 137 (100.0%)    | 128 (93.4%)                               | 9 (6.6%)                                 | 0 (0.0%)                             | 10,395                                                          | 3,280 – 25,672 | 0.9          |
| <b>Diabetes</b>                                      | 95 (100.0%)     | 89 (93.7%)                                | 5 (5.3%)                                 | 1 (1.1%)                             | 8,748                                                           | 2,950 – 19,346 | <b>0.04</b>  |
| <b>Immunosuppression</b>                             | 80 (100.0%)     | 68 (85.0%)                                | 7 (8.8%)                                 | 5 (6.2%)                             | 7,451                                                           | 1,503 – 17,695 | <b>0.002</b> |
| <b>Psoriasis</b>                                     | 48 (100.0%)     | 43 (89.6%)                                | 5 (10.4%)                                | 0 (0.0%)                             | 7,435                                                           | 2,573 – 13,850 | 0.06         |
| <b>Heart disease</b>                                 | 34 (100.0%)     | 32 (94.1%)                                | 2 (5.9%)                                 | 0 (0.0%)                             | 13,925                                                          | 4,999 – 22,430 | 0.7          |
| <b>Non-haematological malignancy</b>                 | 41 (100.0%)     | 40 (97.6%)                                | 1 (2.4%)                                 | 0 (0.0%)                             | 13,159                                                          | 9,261 – 23,955 | 0.3          |
| <b>Rheumatological disorder</b>                      | 27 (100.0%)     | 24 (88.9%)                                | 2 (7.4%)                                 | 1 (3.7%)                             | 5,691                                                           | 1,770 – 15,567 | 0.05         |
| <b>Respiratory disease (excluding asthma)</b>        | 37 (100.0%)     | 33 (89.2%)                                | 4 (10.8%)                                | 0 (0.0%)                             | 6,993                                                           | 2,302 – 12,927 | <b>0.01</b>  |
| <b>Haematological disease (excluding malignancy)</b> | 36 (100.0%)     | 35 (97.2%)                                | 1 (2.8%)                                 | 0 (0.0%)                             | 12,236                                                          | 6,738 – 20,060 | 1            |
| <b>Liver disease</b>                                 | 11 (100.0%)     | 11 (100.0%)                               | 0 (0.0%)                                 | 0 (0.0%)                             | 11,419                                                          | 5,818 – 13,705 | 0.4          |
| <b>Neurological disorder</b>                         | 12 (100.0%)     | 12 (100.0%)                               | 0 (0.0%)                                 | 0 (0.0%)                             | 6,035                                                           | 5,258 – 12,886 | 0.3          |
| <b>CKD stage 3, 4 or 5</b>                           | 6 (100.0%)      | 5 (83.3%)                                 | 0 (0.0%)                                 | 1 (16.7%)                            | 10,129                                                          | 5,672 – 17,965 | 0.7          |

1  
2  
3  
4  
5  
6  
7  
8  
9  
10  
11  
12  
13  
14  
15  
16  
17  
18  
19  
20  
21  
22  
23  
24  
25  
26  
27  
28  
29  
30  
31  
32  
33  
34  
35  
36  
37  
38  
39  
40  
41  
42  
43  
44  
45  
46

|                                                           |            |            |           |           |       |                |                  |
|-----------------------------------------------------------|------------|------------|-----------|-----------|-------|----------------|------------------|
| <b>Lupus</b>                                              | 7 (100.0%) | 5 (71.4%)  | 1 (14.3%) | 1 (14.3%) | 1,478 | 695 – 13,582   | 0.1              |
| <b>Splenic disorder (excluding traumatic splenectomy)</b> | 4 (100.0%) | 4 (100.0%) | 0 (0.0%)  | 0 (0.0%)  | 1,796 | 1,040 – 9,695  | 0.2              |
| <b>Haematological malignancy</b>                          | 3 (100.0%) | 3 (100.0%) | 0 (0.0%)  | 0 (0.0%)  | 7,731 | 7,230 – 16,186 | 0.9              |
| <b>Organ transplant</b>                                   | 5 (100.0%) | 1 (20.0%)  | 0 (0.0%)  | 4 (80.0%) | 11    | 6 - 21         | <b>&lt;0.001</b> |

**Table 2. Comorbidity status of the study cohort according to the peak anti-spike IgG levels post-second vaccination.**

For peer review only

1,555 (95.1%) HCWs had a peak anti-spike IgG level >700 AU/ml, i.e. a level associated with >67% protection from infection (see Methods). 75 (4.6%) HCWs had a suboptimal antibody level between 50 and 700 AU/ml, and 5 (0.3%) HCWs did not generate a positive antibody response (<50 AU/ml) after the second vaccination. Of the 75 and 5 HCWs with low or no antibody response, the median COVID-age risk score was 53 (IQR 36-57) and 76 (IQR 54-85) respectively - higher than in the high response group (50, IQR 35-60) ( $p=0.03$ ), but not sufficiently different for the low response group for COVID-age score alone to identify those likely to be in this group. Among the 80 HCWs with low or no antibody response, 72 received two ChAdOx1 vaccinations, accounting for 18.6% of all the ChAdOx1 recipients, whilst the proportion having a low response was only 0.5% of all the BNT162b2 recipients (**Table 1**). HCWs with specific medical conditions were more likely to be in the low or no response groups including 15% of those reporting taking immunosuppression and several other conditions that may also be treated with immunosuppression, including low/no antibody responses in 10% with psoriasis, 11% with rheumatological disorders, 11% with other (non-asthma) respiratory disorders, 29% with lupus, and 80% with an organ transplant. Of the 5 HCWs with no detectable serological response, all were female and immunosuppressed, 4 HCWs had had organ transplants and the other HCW having an autoimmune disease for which they received rituximab (**Table 2**).

Associations between  $\log_{10}$  antibody levels and covariates in univariable linear regression models are shown in **Table 3**. Older age, black ethnicity, working as a porter or domestic worker, and receiving two ChAdOx1 vaccines were associated with lower peak anti-spike antibody levels 14-84 days post second vaccination. Smoking, diabetes, a respiratory disease other than asthma, chronic kidney disease stage 3, 4, or 5, a rheumatological disorder, lupus, being immunosuppressed, or having had an organ transplant were all associated with lower antibody levels. A higher COVID-age score, which indicated higher risk of mortality from infection, was also associated with lower antibody levels ( $p<0.001$ ). Having evidence of COVID-19 infection prior to vaccination, as well as being a laboratory staff worker, were both associated with having higher antibody levels. No evidence of an association was found between antibody levels and sex or BMI.

1,593 HCWs with complete information on all variables were included in the multivariable model. The baseline intercept in  $\log_{10}$  scale was 4.25. Older age (-0.03 per 10 years older, 95% Confidence interval: -0.05, -0.01), diabetes (-0.14, 95%CI: -0.22, -0.05), a respiratory condition other than asthma (-0.17, 95%CI: -0.3, -0.04), an organ transplant (-2.66, 95%CI: -3.01, -2.31), being immunosuppressed (-0.22, 95%CI: -0.31, -0.13), and receiving two ChAdOx1 vaccinations (-0.91, 95%CI: -0.96, -0.87) were all independently associated with lower peak spike antibody levels 14-84 days post second vaccination. Having evidence of prior infection was associated with having higher antibody levels (0.29, 95%CI: 0.24, 0.34) (**Table 3**).



|                    |                            | Univariable  |              |        |       | Multivariable |                  |        |       |
|--------------------|----------------------------|--------------|--------------|--------|-------|---------------|------------------|--------|-------|
|                    |                            | Co-efficient | p-value      | 95% CI |       | Co-efficient  | p-value          | 95% CI |       |
| <b>Age</b>         | per 10 year older          | -0.034       | <b>0.002</b> | -0.06  | -0.01 | -0.03         | <b>&lt;0.001</b> | -0.05  | -0.01 |
| <b>Sex</b>         | Female                     | 1(ref)       |              |        |       |               |                  |        |       |
|                    | Male                       | 0.02         | 0.6          | -0.06  | 0.09  | -0.04         | 0.1              | -0.09  | 0.01  |
| <b>Ethnicity</b>   | White                      | 1(ref)       |              |        |       |               |                  |        |       |
|                    | Asian                      | 0.01         | 0.7          | -0.06  | 0.09  |               |                  |        |       |
|                    | Black                      | -0.22        | <b>0.009</b> | -0.38  | -0.05 |               |                  |        |       |
|                    | Mixed                      | 0.07         | 0.5          | -0.13  | 0.26  |               |                  |        |       |
|                    | Other                      | -0.07        | 0.4          | -0.23  | 0.09  |               |                  |        |       |
| <b>Role</b>        | Nurse / HCA                | 1(ref)       |              |        |       |               |                  |        |       |
|                    | Doctor                     | 0.1          | 0.1          | -0.02  | 0.22  |               |                  |        |       |
|                    | Administrative staff       | 0.07         | 0.1          | -0.01  | 0.15  |               |                  |        |       |
|                    | OT/PT/SLT                  | 0.11         | 0.1          | -0.03  | 0.26  |               |                  |        |       |
|                    | Laboratory staff           | 0.24         | <b>0.002</b> | 0.09   | 0.39  |               |                  |        |       |
|                    | Porter or domestic worker  | -0.23        | <b>0.03</b>  | -0.44  | -0.03 |               |                  |        |       |
|                    | Medical or nursing student | 0.07         | 0.7          | -0.26  | 0.4   |               |                  |        |       |
|                    | Other                      | -0.06        | 0.1          | -0.14  | 0.01  |               |                  |        |       |
| <b>BMI</b>         | <16                        | -0.13        | 0.7          | -0.8   | 0.53  |               |                  |        |       |
|                    | 16-24.9                    | 1(ref)       |              |        |       |               |                  |        |       |
|                    | 25-29.9                    | -0.06        | 0.1          | -0.12  | 0.01  |               |                  |        |       |
|                    | 30-34.9                    | 0.01         | 0.9          | -0.08  | 0.09  |               |                  |        |       |
|                    | 35-39.9                    | 0.01         | 0.9          | -0.12  | 0.14  |               |                  |        |       |
|                    | 40+                        | 0.05         | 0.5          | -0.09  | 0.19  |               |                  |        |       |
| <b>Comorbidity</b> | Yes vs. No                 |              |              |        |       |               |                  |        |       |
|                    | Smoking                    | -0.17        | <b>0.003</b> | -0.29  | -0.06 | -0.06         | 0.1              | -0.14  | 0.02  |
|                    | Pregnant                   | 0.13         | 0.3          | -0.11  | 0.37  |               |                  |        |       |
|                    | Asthma                     | 0.005        | 0.9          | -0.15  | 0.04  |               |                  |        |       |
|                    | Hypertension               | -0.06        | 0.2          | -0.15  | 0.03  | -0.06         | 0.1              | -0.12  | 0.01  |

|                                                               |                                                    |        |                  |       |       |       |                  |       |       |
|---------------------------------------------------------------|----------------------------------------------------|--------|------------------|-------|-------|-------|------------------|-------|-------|
|                                                               | Thyroid disorder (excluding malignancy)            | 0.01   | 0.9              | -0.09 | 0.11  | 0.05  | 0.1              | -0.02 | 0.12  |
|                                                               | Diabetes                                           | -0.14  | <b>0.03</b>      | -0.26 | -0.01 | -0.14 | <b>&lt;0.001</b> | -0.22 | -0.05 |
|                                                               | Immunosuppression                                  | -0.38  | <b>&lt;0.001</b> | -0.51 | -0.25 | -0.22 | <b>&lt;0.001</b> | -0.31 | -0.13 |
|                                                               | Psoriasis                                          | -0.13  | 0.1              | -0.3  | 0.04  |       |                  |       |       |
|                                                               | Heart disease                                      | 0.05   | 0.6              | -0.14 | 0.25  |       |                  |       |       |
|                                                               | Non-haematological malignancy                      | 0.14   | 0.1              | -0.04 | 0.32  | 0.13  | <b>0.04</b>      | 0.01  | 0.25  |
|                                                               | Rheumatological disorder                           | -0.28  | <b>0.01</b>      | -0.5  | -0.06 |       |                  |       |       |
|                                                               | Respiratory disease (excluding asthma)             | -0.22  | <b>0.02</b>      | -0.41 | -0.03 | -0.17 | <b>0.01</b>      | -0.3  | -0.04 |
|                                                               | Haematological disease (excluding malignancy)      | 0.06   | 0.6              | -0.14 | 0.25  |       |                  |       |       |
|                                                               | Liver disease                                      | -0.03  | 0.9              | -0.38 | 0.32  |       |                  |       |       |
|                                                               | Neurological disorder                              | -0.001 | 0.9              | -0.33 | 0.33  |       |                  |       |       |
|                                                               | CKD stage 3, 4 or 5                                | -0.84  | <b>&lt;0.001</b> | -1.3  | -0.37 |       |                  |       |       |
|                                                               | Lupus                                              | -0.68  | <b>0.002</b>     | -1.1  | -0.24 |       |                  |       |       |
|                                                               | Splenic disorder (excluding traumatic splenectomy) | -0.42  | 0.2              | -1    | 0.15  |       |                  |       |       |
|                                                               | Haematological malignancy                          | 0.13   | 0.7              | -0.53 | 0.79  |       |                  |       |       |
|                                                               | Organ transplant                                   | -3.06  | <b>&lt;0.001</b> | -3.55 | -2.57 | -2.66 | <b>&lt;0.001</b> | -3.01 | -2.31 |
| <b>Vaccination</b>                                            | BNT162b2/BNT162b2                                  |        |                  |       |       |       |                  |       |       |
|                                                               | ChAdOx1/ChAdOx1                                    | -0.9   | <b>&lt;0.001</b> | -0.95 | -0.85 | -0.91 | <b>&lt;0.001</b> | -0.96 | -0.87 |
| <b>Evidence of Covid-19 infection at baseline (Yes vs No)</b> |                                                    | 0.25   | <b>&lt;0.001</b> | 0.18  | 0.33  | 0.29  | <b>&lt;0.001</b> | 0.24  | 0.34  |
| <b>COVID-age Score</b>                                        | per 10 score higher                                | -0.05  | <b>&lt;0.001</b> | -0.06 | -0.03 |       |                  |       |       |

**Table 3. Association between the peak anti-spike IgG antibody levels 14-84 days post-second vaccination dose with each characteristic from the univariable model and multivariable model.** Bold indicates a significant p value <0.05. The outcome was modelled in log<sub>10</sub> scale. Variables in the multivariable model were selected using backward selection by Akaike Information Criteria (AIC). OT/PT/SLT: occupational therapist, physiotherapist, and speech and language therapist. HCA: healthcare assistant.

## Discussion

While SARS-CoV-2 vaccination offers substantial protection from infection for most HCWs, we found several risk factors associated with lower antibody levels in HCWs after vaccination, including older age, diabetes, respiratory diseases other than asthma, being immunosuppressed, and having had an organ transplant. Infection before the first vaccination led to higher antibody levels post vaccination.

Only 5 (0.3%) HCWs did not seroconvert post second vaccination, which is a smaller proportion than the approximately 1% of the general population who do not seroconvert after two vaccinations<sup>17</sup>, and reflects the effectiveness of two vaccine doses in generating antibody responses in this population of predominantly healthy adults of working age.

Receiving two ChAdOx1 vaccine doses yielded lower antibody levels than receiving two BNT162b2 vaccine doses. Although this has been previously reported<sup>17</sup> and may not reflect overall vaccine effectiveness, it was potentially an important factor in many of the 75 (4.6%) HCWs with low antibody responses. These HCWs had peak antibody levels lower than the level associated with 67% protection against the Delta variant infection in a previous study (100 BAU/mL, 700 AU/ml)<sup>17</sup>.

Further, with new variants circulating, such as Omicron, with higher antibody levels required for the same level of protection<sup>18,19</sup>, two doses of vaccination may not provide good levels of protection for this group.

Among the 80 HCWs who had no or low antibody response, most had underlying medical conditions, including immunosuppression or organ transplant, and 72 had received ChAdOx1 vaccination. These were also identified as the main risk factors for having lower antibody levels in the multivariable regression model, similar to previous studies reporting low antibody levels or seroconversion rate in organ transplant or immunosuppressed patients<sup>20,21</sup>. Therefore, it may be helpful to routinely assess post-vaccination antibody levels in HCWs with comorbidities, especially immunosuppression or organ transplantation. Booster mRNA vaccine doses should be prioritised for this population, in particular those with two prior ChAdOx1 doses, as evidence has shown that a third or fourth dose could significantly improve the suboptimal immune response in organ transplant recipients<sup>22-24</sup>.

Other comorbidities independently associated with lower antibody levels post vaccination were diabetes and respiratory diseases other than asthma. Antibody response and seropositivity rates in diabetes patients were also found to be lower than in the healthy population after vaccination in a recent systematic review<sup>25</sup>. We did not find an association between peak antibody levels with BMI, but a study in Scotland suggested that obesity could lead to a short-lived antibody response after vaccination, which may explain some of the increased risk of severe disease in people with obesity<sup>26</sup>.

1  
2  
3 We also examined the relationship between a COVID-age risk stratification score and vaccine  
4 response. The ALAMA COVID-age score is based on OpenSafely data<sup>4</sup> and assesses demographic and  
5 health-related risk factors to calculate personal vulnerability to COVID-19, which can be quantified as  
6 the probability of death should infection occur in the absence of vaccination or previous infection. In  
7 our cohort, 6-7% of HCWs had a high risk, and 1-2% of HCWs had a very high risk based on the  
8 scoring system. Overall higher risk groups had lower antibody levels post second vaccination. The  
9 COVID-age score can thus potentially be used to identify HCWs at risk of lower antibody levels.  
10 However, in most instances these were still at levels associated with high levels of protection against  
11 infection, with a median peak level of around 10,000 for the low to high-risk groups. The peak level  
12 was lower in the 'very high' risk group, but more than 75% of HCWs in this group still generated peak  
13 levels >700 AU/ml (associated with 67% protection against the Delta variant infection<sup>17</sup>). Therefore,  
14 vaccination (or previous infection) could provide good immunity and potentially reduce the personal  
15 vulnerability to COVID-19 for most HCWs. However, a small minority of HCWs may not be well  
16 protected by vaccination and these individuals are also potentially at higher risk of adverse  
17 outcomes if infected. Therefore, HCWs assessed as at 'very high' risk of more severe outcome from  
18 COVID infection who do not have a history of previous COVID infection should have further vaccine  
19 outcome assessment as part of their occupational risk assessment. In those with limited antibody  
20 responses, if these remain after booster vaccinations, it may be appropriate to put in place  
21 enhanced additional risk mitigations for those HCWs wishing to remain in their current role.  
22  
23  
24  
25  
26  
27  
28  
29  
30  
31  
32  
33  
34

35  
36 Limitations of this study include that we only examined the peak anti-spike IgG levels after the  
37 second vaccination and did not assess antibody waning longitudinally. We therefore did not assess  
38 antibody responses after a third booster dose, and this requires further study. We only measured  
39 anti-spike IgG levels using a single assay and did not measure neutralizing antibodies or T-cell  
40 responses. Vaccine induces a broad range of both B and T cell responses and measure of  
41 quantitative IgG antibody is only a surrogate for a broad range of immune response<sup>27</sup>. However, the  
42 assay is commercially available and well-calibrated as previously described<sup>15</sup>, and neutralizing  
43 antibodies are strongly correlated with anti-spike antibodies<sup>17</sup>. The wider generalizability of the  
44 analyses is limited given the cohort included in this analysis was predominantly working-age HCWs  
45 with 82% being female and 72% of white ethnicity. However, this cohort had diverse health care  
46 roles and comorbidities and provides useful data for decision making related to HCWs. Future work  
47 with HCWs could focus on creating risk models that adjust for vaccination status, and ideally markers  
48 of vaccination response such as antibody levels.  
49  
50  
51  
52  
53  
54  
55  
56

57  
58 In conclusion, most HCWs seroconverted after their second vaccination including those who had a  
59 high risk of adverse outcomes from COVID-19, indicating that two vaccinations are generally  
60

1  
2  
3 effective in generating antibody responses among HCWs, such that large-scale antibody testing is  
4 not necessary. However, given the high exposure to SARS-CoV-2, routine antibody assessments  
5 among high-risk HCWs, such as immunosuppressed patients or organ transplant recipients, could be  
6 important, and further booster vaccinations should be prioritised for these groups to improve their  
7 immune response alongside careful use of other protective measures.  
8  
9  
10  
11  
12  
13  
14  
15  
16  
17  
18

## 19 Ethics Approval

20  
21 Following approval from the OUH's Caldicott guardian, deidentified data were obtained from the  
22 Infections in Oxfordshire Research Database (IORD), which has approvals from the National Research  
23 Ethics Service South Central – Oxford C Research Ethics Committee (19/SC/0403), the Health  
24 Research Authority and the national Confidentiality Advisory Group (19/CAG/0144).  
25  
26  
27  
28  
29  
30

## 31 Contribution statement

32  
33 The study was designed and planned by WG, EB, SD, KJ, DWE, and AO. This specific analysis was  
34 designed by VW, JW, and DWE. VW and JW contributed to the statistical analysis of the data. VW,  
35 JW, DWE, and AO drafted the manuscript and all authors contributed to interpretation of the data  
36 and results and revised the manuscript. All authors approved the final version of the manuscript.  
37  
38  
39  
40  
41  
42  
43

## 44 Competing Interests statement

45  
46 DWE declares lecture fees from Gilead, outside the submitted work. No other author has a conflict  
47 of interest to declare.  
48  
49  
50  
51  
52

## 53 Funding

54  
55 This work was supported by the National Institute for Health Research Health Protection Research  
56 Unit (NIHR HPRU) in Healthcare Associated Infections and Antimicrobial Resistance at Oxford  
57 University in partnership with the UK Health Security Agency (NIHR200915), and the NIHR  
58  
59  
60

1  
2  
3 Biomedical Research Centre, Oxford. EB is an NIHR Senior Investigator. SJD is funded by an NIHR  
4 Global Research Professorship (NIHR300791). DWE is a Big Data Institute Robertson Fellow. The  
5 views expressed are those of the authors and not necessarily those of the NHS, the NIHR, the  
6 Department of Health or the UK Health Security Agency. The funders had no role in study design,  
7 data collection and analysis, decision to publish, or preparation of the manuscript.  
8  
9  
10  
11  
12  
13  
14

## 15 Data sharing statement

16  
17 The data analysed during the current study are not publicly available as they contain personal data  
18 but are available from the Infections in Oxfordshire Research Database  
19 ([https://oxfordbrc.nihr.ac.uk/research-themes-overview/antimicrobial-resistance-and-modernising-](https://oxfordbrc.nihr.ac.uk/research-themes-overview/antimicrobial-resistance-and-modernising-microbiology/infections-in-oxfordshire-research-database-iord/)  
20 [microbiology/infections-in-oxfordshire-research-database-iord/](https://oxfordbrc.nihr.ac.uk/research-themes-overview/antimicrobial-resistance-and-modernising-microbiology/infections-in-oxfordshire-research-database-iord/)), subject to an application and  
21 research proposal meeting the ethical and governance requirements of the Database.  
22  
23  
24  
25  
26  
27  
28

## 29 Acknowledgement

30  
31 This work uses data provided by healthcare workers and collected by the UK's National Health  
32 Service as part of their care and support. We thank all the people of Oxfordshire who contribute to  
33 the Infections in Oxfordshire Research Database.  
34  
35  
36

37 Research Database Team: L Butcher, H Boseley, C Crichton, DW Crook, D Eyre, O Freeman, J Gearing  
38 (community), R Harrington, K Jeffery, M Landray, A Pal, TEA Peto, TP Quan, J Robinson (community),  
39 J Sellors, B Shine, AS Walker, D Waller. Patient and Public Panel: G Blower, C Mancey, P McLoughlin,  
40 B Nichols.  
41  
42  
43  
44  
45  
46  
47  
48  
49

## 50 References

- 51  
52  
53 1. Eyre, D. W. *et al.* Differential occupational risks to healthcare workers from SARS-CoV-2  
54 observed during a prospective observational study. *Elife* **9**, 1–37 (2020).  
55  
56 2. Platten, M. *et al.* Cumulative Incidence of SARS-CoV-2 in Healthcare Workers at a General  
57 Hospital in Germany during the Pandemic-A Longitudinal Analysis. *Int J Environ Res Public*  
58 *Health* **19**, (2022).  
59  
60

3. Szajek, K. *et al.* Healthcare institutions' recommendation regarding the use of FFP-2 masks and SARS-CoV-2 seropositivity among healthcare workers: a multicenter longitudinal cohort study. *Antimicrob Resist Infect Control* **11**, 6 (2022).
4. Covid-19 Medical Risk Assessment – Alama. <https://alama.org.uk/covid-19-medical-risk-assessment/>.
5. Bernal, J. L. *et al.* Effectiveness of the Pfizer-BioNTech and Oxford-AstraZeneca vaccines on covid-19 related symptoms, hospital admissions, and mortality in older adults in England: test negative case-control study. *BMJ* **373**, (2021).
6. Polack, F. P. *et al.* Safety and Efficacy of the BNT162b2 mRNA Covid-19 Vaccine. *The New England Journal of Medicine* **383**, 2603–2615 (2020).
7. Shrotri, M. *et al.* Vaccine effectiveness of the first dose of ChAdOx1 nCoV-19 and BNT162b2 against SARS-CoV-2 infection in residents of long-term care facilities in England (VIVALDI): a prospective cohort study. *The Lancet Infectious Diseases* (2021) doi:10.1016/S1473-3099(21)00289-9.
8. Feikin, D. R. *et al.* Duration of effectiveness of vaccines against SARS-CoV-2 infection and COVID-19 disease: results of a systematic review and meta-regression. *Lancet* **399**, (2022).
9. Lumley, S. F. *et al.* The Duration, Dynamics, and Determinants of Severe Acute Respiratory Syndrome Coronavirus 2 (SARS-CoV-2) Antibody Responses in Individual Healthcare Workers. *Clinical Infectious Diseases* **73**, e699–e709 (2021).
10. Çağlayan, D. *et al.* An analysis of antibody response following the second dose of CoronaVac and humoral response after booster dose with BNT162b2 or CoronaVac among healthcare workers in Turkey. *Journal of Medical Virology* (2022) doi:10.1002/JMV.27620.
11. Buonfrate, D. *et al.* Antibody response induced by the BNT162b2 mRNA COVID-19 vaccine in a cohort of health-care workers, with or without prior SARS-CoV-2 infection: a prospective study. *Clin Microbiol Infect* **27**, 1845–1850 (2021).
12. Saadat, S. *et al.* Binding and Neutralization Antibody Titers After a Single Vaccine Dose in Health Care Workers Previously Infected With SARS-CoV-2. *JAMA* **325**, 1467–1469 (2021).
13. Jabal, K. A. *et al.* Impact of age, ethnicity, sex and prior infection status on immunogenicity following a single dose of the BNT162b2 mRNA COVID-19 vaccine: real-world evidence from healthcare workers, Israel, December 2020 to January 2021. *Eurosurveillance* **26**, 2100096 (2021).
14. Lumley, S. F. *et al.* Antibody Status and Incidence of SARS-CoV-2 Infection in Health Care Workers. *New England Journal of Medicine* **384**, 533–540 (2021).
15. Eyre, D. W. *et al.* Quantitative SARS-CoV-2 anti-spike responses to Pfizer–BioNTech and Oxford–AstraZeneca vaccines by previous infection status. *Clinical Microbiology and Infection* (2021) doi:10.1016/J.CMI.2021.05.041.
16. Ainsworth, M. *et al.* Performance characteristics of five immunoassays for SARS-CoV-2: a head-to-head benchmark comparison. *The Lancet Infectious Diseases* **20**, 1390–1400 (2020).

17. Wei, J. *et al.* Antibody responses and correlates of protection in the general population after two doses of the ChAdOx1 or BNT162b2 vaccines. *Nature Medicine* 2022 1–11 (2022) doi:10.1038/s41591-022-01721-6.
18. Carreño, J. M. *et al.* Activity of convalescent and vaccine serum against SARS-CoV-2 Omicron. *Nature* **602**, (2022).
19. Garcia-Beltran, W. F. *et al.* mRNA-based COVID-19 vaccine boosters induce neutralizing immunity against SARS-CoV-2 Omicron variant. *Cell* **185**, 457-466.e4 (2022).
20. Bertram, S. *et al.* Predictors of impaired SARS-CoV-2 immunity in healthcare workers after vaccination with BNT162b2. *Scientific Reports* **12**, 6243 (2022).
21. Boyarsky, B. J. *et al.* Immunogenicity of a Single Dose of SARS-CoV-2 Messenger RNA Vaccine in Solid Organ Transplant Recipients. *JAMA* **325**, 1784–1786 (2021).
22. Davidov, Y. *et al.* A third dose of the BNT162b2 mRNA vaccine significantly improves immune responses among liver transplant recipients. *J Hepatol* (2022) doi:10.1016/J.JHEP.2022.03.042.
23. Hod, T. *et al.* BNT162b2 Third Booster Dose Significantly Increases the Humoral Response Assessed by Both RBD IgG and Neutralizing Antibodies in Renal Transplant Recipients. *Transpl Int* **35**, 10239 (2022).
24. Schimpf, J. *et al.* Enhanced SARS-CoV-2 Antibody Response After a Third Heterologous Vector Vaccine Ad26COVS1 Dose in mRNA Vaccine-Primed Kidney Transplant Recipients. *Transplant International* **36**, (2022).
25. Soetedjo, N. N. M., Iryaningrum, M. R., Lawrensia, S. & Permana, H. Antibody response following SARS-CoV-2 vaccination among patients with type 2 diabetes mellitus: A systematic review. *Diabetes Metab Syndr* **16**, (2022).
26. Klaauw, A. A. van der *et al.* Accelerated waning of the humoral response to SARS-CoV-2 vaccines in obesity. *medRxiv* **7**, 2022.06.09.22276196 (2022).
27. Moore, S. C. *et al.* Evolution of long-term hybrid immunity in healthcare workers after different COVID-19 vaccination regimens: a longitudinal observational cohort study. *medRxiv* **28**, 2022.06.06.22275865 (2022).

## Figure legend

**Figure 1. Box and whisker plot of peak anti-spike IgG levels 14-84 days post-second vaccination according to COVID-age score (a) and comorbidities (b).** The number on top of each panel indicates the total number of HCWs in each group. Thyroid disorder excludes malignancy, respiratory disease excludes asthma, haematological disease excludes malignancy, splenic disorder excludes traumatic splenectomy.



1  
2  
3  
4  
5  
6  
7  
8  
9  
10  
11  
12  
13  
14  
15  
16  
17  
18  
19  
20  
21  
22  
23  
24  
25  
26  
27  
28  
29  
30  
31  
32  
33  
34  
35  
36  
37  
38  
39  
40  
41  
42  
43  
44  
45  
46  
47  
48  
49  
50  
51  
52  
53  
54  
55  
56

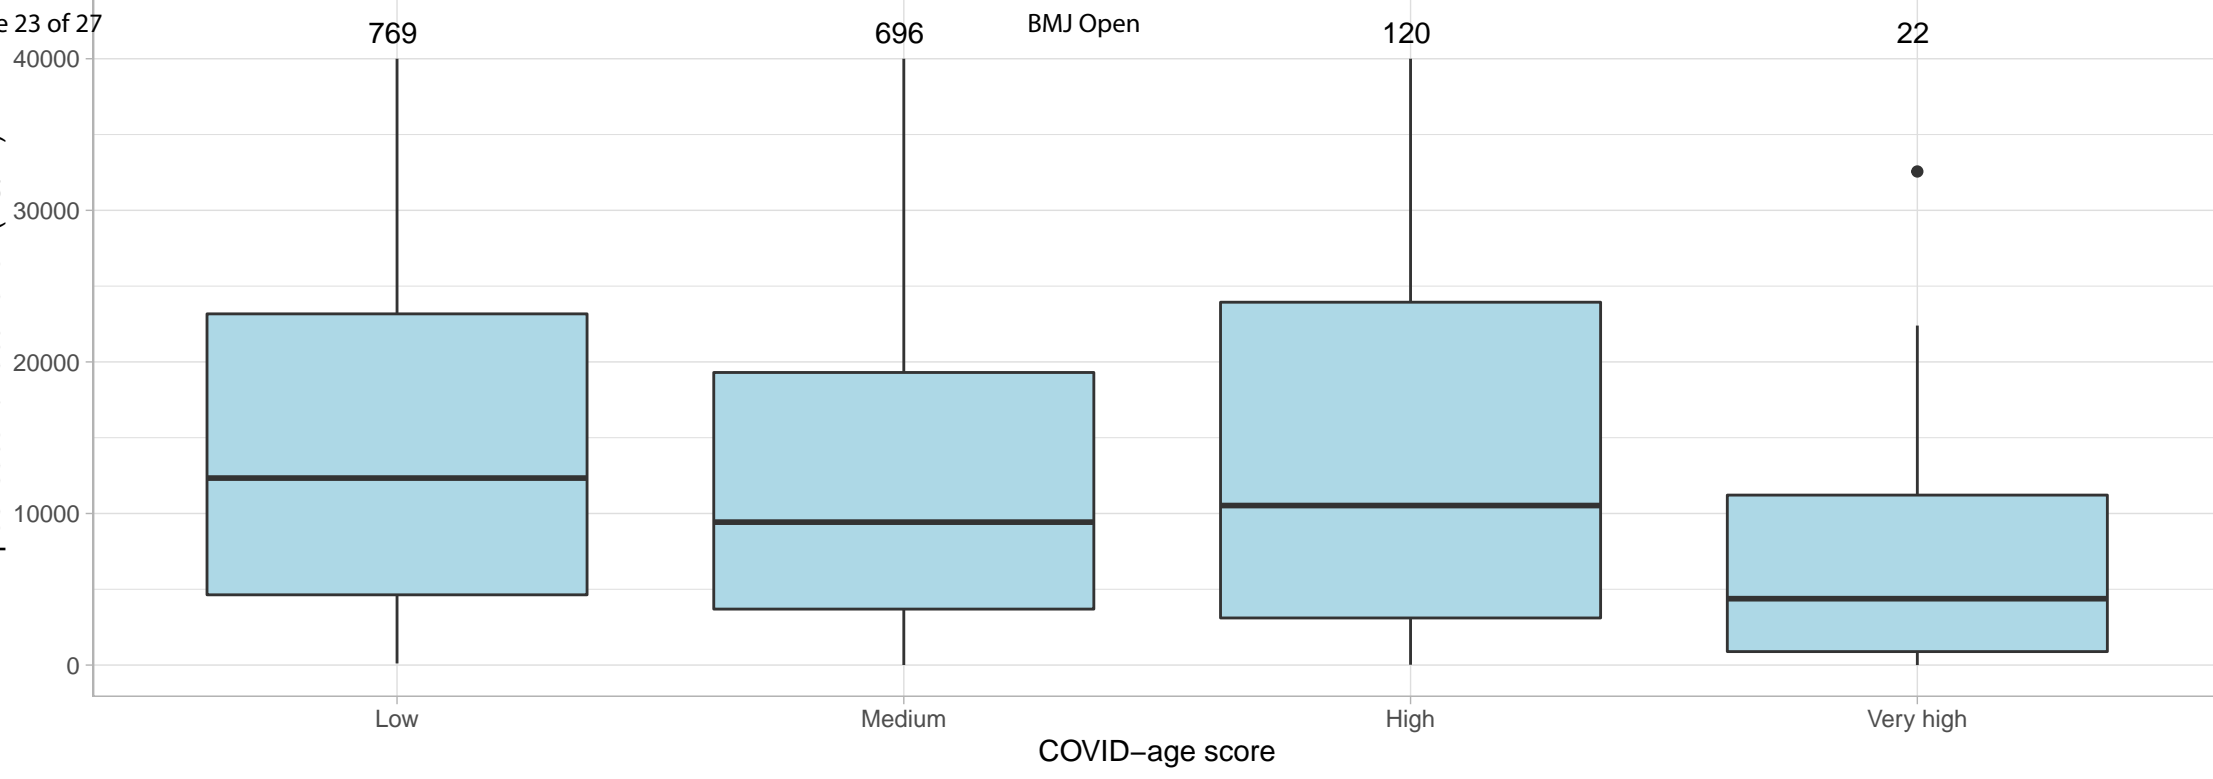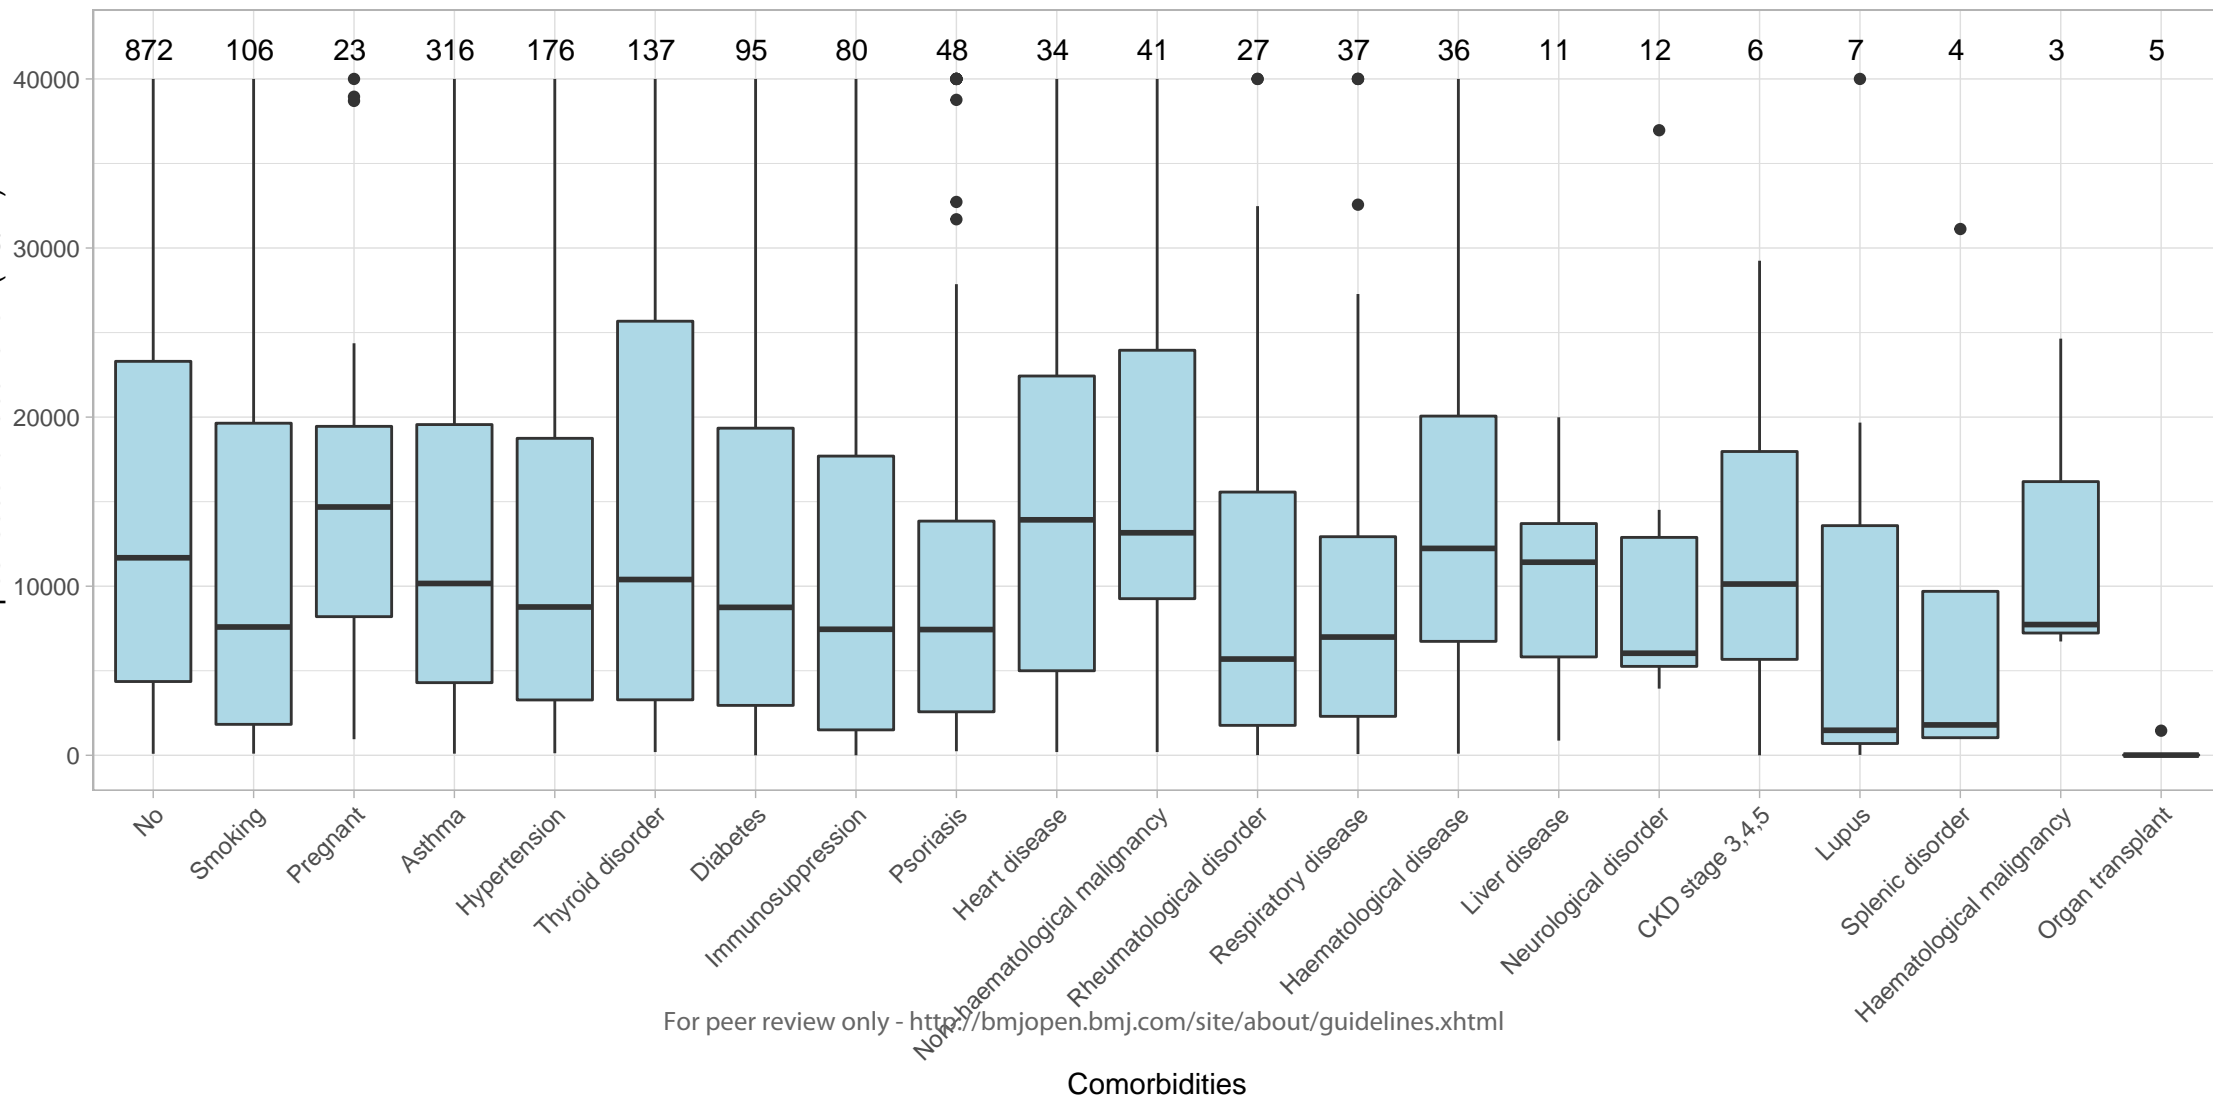

|                                                | Overall (n=5,968) | Included in the analysis (n=1,635) |
|------------------------------------------------|-------------------|------------------------------------|
| <b>Age group</b>                               |                   |                                    |
| 17-34                                          | 2,162 (36.6%)     | 457 (28.0%)                        |
| 35-54                                          | 2,509 (42.5%)     | 723 (44.2%)                        |
| 55-77                                          | 1,232 (20.9%)     | 455 (27.8%)                        |
| <b>Sex</b>                                     |                   |                                    |
| Female                                         | 4,594 (77.8%)     | 1,344 (82.2%)                      |
| Male                                           | 1,298 (22.0%)     | 290 (17.7%)                        |
| Other                                          | 11 (0.2%)         | 1 (0.1%)                           |
| <b>Ethnicity</b>                               |                   |                                    |
| White                                          | 3,623 (60.7%)     | 1,169 (71.5%)                      |
| Asian                                          | 1,479 (24.8%)     | 304 (18.6%)                        |
| Black                                          | 339 (5.7%)        | 50 (3.1%)                          |
| Mixed                                          | 137 (2.3%)        | 36 (2.2%)                          |
| Other                                          | 176 (2.9%)        | 55 (3.4%)                          |
| Not stated                                     | 214 (3.6%)        | 21 (1.3%)                          |
| <b>Role</b>                                    |                   |                                    |
| Administrative Staff                           | 912 (15.4%)       | 245 (15.0%)                        |
| Doctor                                         | 920 (15.6%)       | 106 (6.5%)                         |
| Laboratory Staff                               | 138 (2.3%)        | 61 (3.7%)                          |
| Medical or nursing Student                     | 65 (1.1%)         | 12 (0.7%)                          |
| Nurse/HCA                                      | 2,602 (44.1%)     | 779 (47.6%)                        |
| Other                                          | 959 (16.2%)       | 331 (20.2%)                        |
| Porter/Domestic                                | 138 (2.3%)        | 31 (1.9%)                          |
| PT/OT/SLT                                      | 169 (2.9%)        | 70 (4.3%)                          |
| <b>BMI</b>                                     |                   |                                    |
| <16                                            | 11 (0.2%)         | 3 (0.2%)                           |
| 16-24.9                                        | 2,696 (45.2%)     | 698 (42.7%)                        |
| 25-29.9                                        | 1,939 (32.5%)     | 517 (31.6%)                        |
| 30-34.9                                        | 829 (13.9%)       | 261 (16.0%)                        |
| 35-39.9                                        | 295 (4.9%)        | 85 (5.2%)                          |
| 40+                                            | 198 (3.3%)        | 71 (4.3%)                          |
| <b>Comorbidity</b>                             |                   |                                    |
| No                                             | 3,336 (55.9%)     | 872 (53.3%)                        |
| Yes                                            | 2,632 (44.1%)     | 763 (46.7%)                        |
| <b>Smoking</b>                                 | 412 (6.9%)        | 106 (6.5%)                         |
| <b>Pregnant</b>                                | 396 (6.6%)        | 23 (1.4%)                          |
| <b>Asthma</b>                                  | 939 (15.7%)       | 316 (19.3%)                        |
| <b>Hypertension</b>                            | 478 (8.0%)        | 176 (10.8%)                        |
| <b>Thyroid disorder (excluding malignancy)</b> | 390 (6.5%)        | 137 (8.4%)                         |
| <b>Diabetes</b>                                | 314 (5.3%)        | 95 (5.8%)                          |
| <b>Immunosuppression</b>                       | 216 (3.6%)        | 80 (4.9%)                          |
| <b>Psoriasis</b>                               | 146 (2.4%)        | 48 (2.9%)                          |
| <b>Heart disease</b>                           | 117 (2.0%)        | 34 (2.1%)                          |

|                                                    |               |               |
|----------------------------------------------------|---------------|---------------|
| Non-haematological malignancy                      | 112 (1.9%)    | 41 (2.5%)     |
| Rheumatological disorder                           | 111 (1.9%)    | 27 (1.7%)     |
| Respiratory disease (excluding asthma)             | 98 (1.6%)     | 37 (2.3%)     |
| Haematological disease (excluding malignancy)      | 90 (1.5%)     | 36 (2.2%)     |
| Liver disease                                      | 40 (0.7%)     | 11 (0.7%)     |
| Neurological disorder                              | 40 (0.7%)     | 12 (0.7%)     |
| CKD stage 3, 4 or 5                                | 26 (0.4%)     | 6 (0.4%)      |
| Lupus                                              | 20 (0.3%)     | 7 (0.4%)      |
| Splenic disorder (excluding traumatic splenectomy) | 14 (0.2%)     | 4 (0.2%)      |
| Haematological malignancy                          | 12 (0.2%)     | 3 (0.2%)      |
| Organ transplant                                   | 10 (0.2%)     | 5 (0.3%)      |
| <b>Vaccine combination</b>                         |               |               |
| ChAdOx1/ChAdOx1                                    | 678 (23.5%)   | 387 (23.7%)   |
| BNT162b2/BNT162b2                                  | 2,164 (75.2%) | 1,234 (75.5%) |
| Other                                              | 37 (1.3%)     | 13 (0.8%)     |
| <b>COVID-age score</b>                             |               |               |
| Low                                                | 3,433 (59.9%) | 769 (47.9%)   |
| Medium                                             | 1,867 (32.6%) | 696 (43.3%)   |
| High                                               | 366 (6.4%)    | 120 (7.5%)    |
| Very high                                          | 65 (1.1%)     | 22 (1.4%)     |

**Table S1. Comparison of characteristics between the overall population (HCWs with serological data) and the cohort included in the analysis (HCWs with anti-spike IgG measurement 14-84 days post-second vaccination dose). OT/PT/SLT: occupational therapist, physiotherapist, and speech and language therapist. HCA: healthcare assistant.**

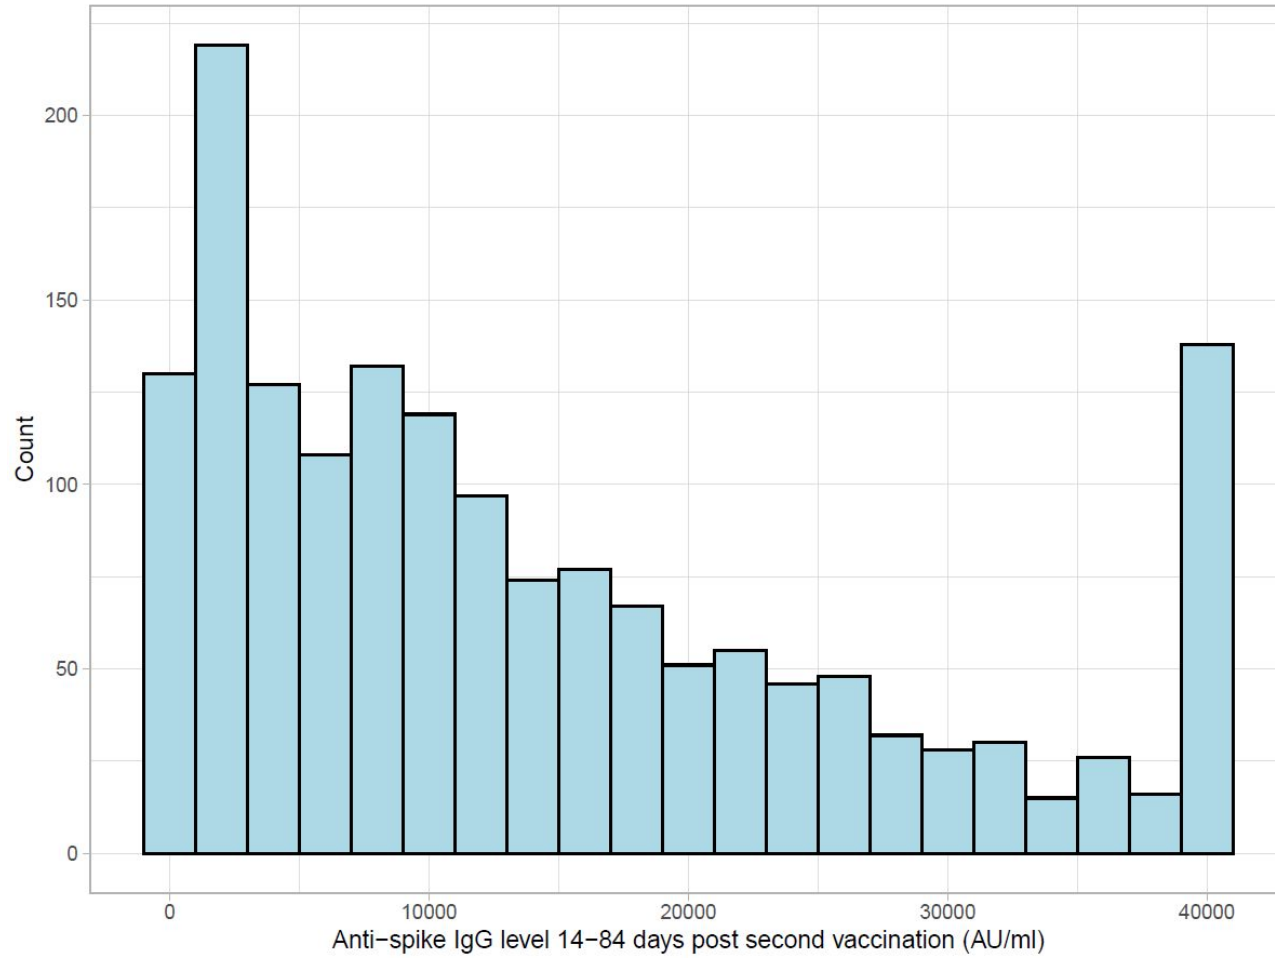

**Figure S1. Distribution of peak anti-spike IgG levels 14-84 days post-second vaccination in 1635 HCWs.**

## STROBE Statement—checklist of items that should be included in reports of observational studies

|                              | Item No | Recommendation                                                                                                                                                                                                                                                                                                                                                                                                                                                         | Page No |
|------------------------------|---------|------------------------------------------------------------------------------------------------------------------------------------------------------------------------------------------------------------------------------------------------------------------------------------------------------------------------------------------------------------------------------------------------------------------------------------------------------------------------|---------|
| <b>Title and abstract</b>    | 1       | (a) Indicate the study's design with a commonly used term in the title or the abstract                                                                                                                                                                                                                                                                                                                                                                                 | 1       |
|                              |         | (b) Provide in the abstract an informative and balanced summary of what was done and what was found                                                                                                                                                                                                                                                                                                                                                                    | 2       |
| <b>Introduction</b>          |         |                                                                                                                                                                                                                                                                                                                                                                                                                                                                        |         |
| Background/rationale         | 2       | Explain the scientific background and rationale for the investigation being reported                                                                                                                                                                                                                                                                                                                                                                                   | 4       |
| Objectives                   | 3       | State specific objectives, including any prespecified hypotheses                                                                                                                                                                                                                                                                                                                                                                                                       | 4       |
| <b>Methods</b>               |         |                                                                                                                                                                                                                                                                                                                                                                                                                                                                        |         |
| Study design                 | 4       | Present key elements of study design early in the paper                                                                                                                                                                                                                                                                                                                                                                                                                | 5       |
| Setting                      | 5       | Describe the setting, locations, and relevant dates, including periods of recruitment, exposure, follow-up, and data collection                                                                                                                                                                                                                                                                                                                                        | 5       |
| Participants                 | 6       | (a) <i>Cohort study</i> —Give the eligibility criteria, and the sources and methods of selection of participants. Describe methods of follow-up<br><i>Case-control study</i> —Give the eligibility criteria, and the sources and methods of case ascertainment and control selection. Give the rationale for the choice of cases and controls<br><i>Cross-sectional study</i> —Give the eligibility criteria, and the sources and methods of selection of participants | 5       |
|                              |         | (b) <i>Cohort study</i> —For matched studies, give matching criteria and number of exposed and unexposed<br><i>Case-control study</i> —For matched studies, give matching criteria and the number of controls per case                                                                                                                                                                                                                                                 | NA      |
| Variables                    | 7       | Clearly define all outcomes, exposures, predictors, potential confounders, and effect modifiers. Give diagnostic criteria, if applicable                                                                                                                                                                                                                                                                                                                               | 6-7     |
| Data sources/<br>measurement | 8*      | For each variable of interest, give sources of data and details of methods of assessment (measurement). Describe comparability of assessment methods if there is more than one group                                                                                                                                                                                                                                                                                   | 6-7     |
| Bias                         | 9       | Describe any efforts to address potential sources of bias                                                                                                                                                                                                                                                                                                                                                                                                              | 7       |
| Study size                   | 10      | Explain how the study size was arrived at                                                                                                                                                                                                                                                                                                                                                                                                                              | 8       |
| Quantitative variables       | 11      | Explain how quantitative variables were handled in the analyses. If applicable, describe which groupings were chosen and why                                                                                                                                                                                                                                                                                                                                           | 6-7     |
| Statistical methods          | 12      | (a) Describe all statistical methods, including those used to control for confounding                                                                                                                                                                                                                                                                                                                                                                                  | 6-7     |
|                              |         | (b) Describe any methods used to examine subgroups and interactions                                                                                                                                                                                                                                                                                                                                                                                                    | 6-7     |
|                              |         | (c) Explain how missing data were addressed                                                                                                                                                                                                                                                                                                                                                                                                                            | 6-7     |
|                              | NA      | (d) <i>Cohort study</i> —If applicable, explain how loss to follow-up was addressed<br><i>Case-control study</i> —If applicable, explain how matching of cases and controls was addressed<br><i>Cross-sectional study</i> —If applicable, describe analytical methods taking account of sampling strategy                                                                                                                                                              | NA      |
|                              |         | (e) Describe any sensitivity analyses                                                                                                                                                                                                                                                                                                                                                                                                                                  | NA      |

Continued on next page

| <b>Results</b>           |     |                                                                                                                                                                                                              |      |
|--------------------------|-----|--------------------------------------------------------------------------------------------------------------------------------------------------------------------------------------------------------------|------|
| Participants             | 13* | (a) Report numbers of individuals at each stage of study—eg numbers potentially eligible, examined for eligibility, confirmed eligible, included in the study, completing follow-up, and analysed            | 8    |
|                          |     | (b) Give reasons for non-participation at each stage                                                                                                                                                         | NA   |
|                          |     | (c) Consider use of a flow diagram                                                                                                                                                                           | NA   |
| Descriptive data         | 14* | (a) Give characteristics of study participants (eg demographic, clinical, social) and information on exposures and potential confounders                                                                     | 8    |
|                          |     | (b) Indicate number of participants with missing data for each variable of interest                                                                                                                          | 8    |
|                          |     | (c) <i>Cohort study</i> —Summarise follow-up time (eg, average and total amount)                                                                                                                             | NA   |
| Outcome data             | 15* | <i>Cohort study</i> —Report numbers of outcome events or summary measures over time                                                                                                                          | NA   |
|                          |     | <i>Case-control study</i> —Report numbers in each exposure category, or summary measures of exposure                                                                                                         | NA   |
|                          |     | <i>Cross-sectional study</i> —Report numbers of outcome events or summary measures                                                                                                                           | 8-9  |
| Main results             | 16  | (a) Give unadjusted estimates and, if applicable, confounder-adjusted estimates and their precision (eg, 95% confidence interval). Make clear which confounders were adjusted for and why they were included | 8-9  |
|                          |     | (b) Report category boundaries when continuous variables were categorized                                                                                                                                    | 8-9  |
|                          |     | (c) If relevant, consider translating estimates of relative risk into absolute risk for a meaningful time period                                                                                             | NA   |
| Other analyses           | 17  | Report other analyses done—eg analyses of subgroups and interactions, and sensitivity analyses                                                                                                               | NA   |
| <b>Discussion</b>        |     |                                                                                                                                                                                                              |      |
| Key results              | 18  | Summarise key results with reference to study objectives                                                                                                                                                     | 9-10 |
| Limitations              | 19  | Discuss limitations of the study, taking into account sources of potential bias or imprecision. Discuss both direction and magnitude of any potential bias                                                   | 11   |
| Interpretation           | 20  | Give a cautious overall interpretation of results considering objectives, limitations, multiplicity of analyses, results from similar studies, and other relevant evidence                                   | 11   |
| Generalisability         | 21  | Discuss the generalisability (external validity) of the study results                                                                                                                                        | 11   |
| <b>Other information</b> |     |                                                                                                                                                                                                              |      |
| Funding                  | 22  | Give the source of funding and the role of the funders for the present study and, if applicable, for the original study on which the present article is based                                                | 14   |

\*Give information separately for cases and controls in case-control studies and, if applicable, for exposed and unexposed groups in cohort and cross-sectional studies.

**Note:** An Explanation and Elaboration article discusses each checklist item and gives methodological background and published examples of transparent reporting. The STROBE checklist is best used in conjunction with this article (freely available on the Web sites of PLoS Medicine at <http://www.plosmedicine.org/>, Annals of Internal Medicine at <http://www.annals.org/>, and Epidemiology at <http://www.epidem.com/>). Information on the STROBE Initiative is available at [www.strobe-statement.org](http://www.strobe-statement.org).

# BMJ Open

## SARS-CoV-2 antibody responses post-vaccination in UK healthcare workers with pre-existing medical conditions: a cohort study

|                                 |                                                                                                                                                                                                                                                                                                                                                                                                                                                                                                                                                                                                                                                                                                                                                                                                                              |
|---------------------------------|------------------------------------------------------------------------------------------------------------------------------------------------------------------------------------------------------------------------------------------------------------------------------------------------------------------------------------------------------------------------------------------------------------------------------------------------------------------------------------------------------------------------------------------------------------------------------------------------------------------------------------------------------------------------------------------------------------------------------------------------------------------------------------------------------------------------------|
| Journal:                        | <i>BMJ Open</i>                                                                                                                                                                                                                                                                                                                                                                                                                                                                                                                                                                                                                                                                                                                                                                                                              |
| Manuscript ID                   | bmjopen-2022-066766.R1                                                                                                                                                                                                                                                                                                                                                                                                                                                                                                                                                                                                                                                                                                                                                                                                       |
| Article Type:                   | Original research                                                                                                                                                                                                                                                                                                                                                                                                                                                                                                                                                                                                                                                                                                                                                                                                            |
| Date Submitted by the Author:   | 10-Oct-2022                                                                                                                                                                                                                                                                                                                                                                                                                                                                                                                                                                                                                                                                                                                                                                                                                  |
| Complete List of Authors:       | Ward, Victoria; University of Oxford, Nuffield Department of Medicine; Oxford University Hospitals<br>Wei, Jia; University of Oxford, Nuffield Department of Medicine; University of Oxford Big Data Institute<br>Gordon, William; Oxford University Hospitals<br>Barnes, Eleanor; University of Oxford, Nuffield Department of Medicine; Oxford University Hospitals<br>Dunachie, Susie; University of Oxford, Nuffield Department of Medicine; Oxford University Hospitals<br>Jeffery, Katie; Oxford University Hospitals; University of Oxford, Radcliffe Department of Medicine<br>Eyre, David; Oxford University Hospitals; University of Oxford, Nuffield Department of Population Health<br>O'Donnell, Anne-Marie; University of Oxford, Nuffield Department of Population Health; Oxford Health NHS Foundation Trust |
| <b>Primary Subject Heading</b>: | Occupational and environmental medicine                                                                                                                                                                                                                                                                                                                                                                                                                                                                                                                                                                                                                                                                                                                                                                                      |
| Secondary Subject Heading:      | Epidemiology, Infectious diseases, Public health                                                                                                                                                                                                                                                                                                                                                                                                                                                                                                                                                                                                                                                                                                                                                                             |
| Keywords:                       | COVID-19, EPIDEMIOLOGY, OCCUPATIONAL & INDUSTRIAL MEDICINE                                                                                                                                                                                                                                                                                                                                                                                                                                                                                                                                                                                                                                                                                                                                                                   |
|                                 |                                                                                                                                                                                                                                                                                                                                                                                                                                                                                                                                                                                                                                                                                                                                                                                                                              |

SCHOLARONE™  
Manuscripts



I, the Submitting Author has the right to grant and does grant on behalf of all authors of the Work (as defined in the below author licence), an exclusive licence and/or a non-exclusive licence for contributions from authors who are: i) UK Crown employees; ii) where BMJ has agreed a CC-BY licence shall apply, and/or iii) in accordance with the terms applicable for US Federal Government officers or employees acting as part of their official duties; on a worldwide, perpetual, irrevocable, royalty-free basis to BMJ Publishing Group Ltd ("BMJ") its licensees and where the relevant Journal is co-owned by BMJ to the co-owners of the Journal, to publish the Work in this journal and any other BMJ products and to exploit all rights, as set out in our [licence](#).

The Submitting Author accepts and understands that any supply made under these terms is made by BMJ to the Submitting Author unless you are acting as an employee on behalf of your employer or a postgraduate student of an affiliated institution which is paying any applicable article publishing charge ("APC") for Open Access articles. Where the Submitting Author wishes to make the Work available on an Open Access basis (and intends to pay the relevant APC), the terms of reuse of such Open Access shall be governed by a Creative Commons licence – details of these licences and which [Creative Commons](#) licence will apply to this Work are set out in our licence referred to above.

Other than as permitted in any relevant BMJ Author's Self Archiving Policies, I confirm this Work has not been accepted for publication elsewhere, is not being considered for publication elsewhere and does not duplicate material already published. I confirm all authors consent to publication of this Work and authorise the granting of this licence.



1  
2  
3  
4 SARS-CoV-2 antibody responses post-vaccination in UK healthcare workers  
5  
6  
7 with pre-existing medical conditions: a cohort study  
8  
9  
10

11 Victoria Ward<sup>1,2\*</sup>, Jia Wei<sup>1,3\*</sup>, William Gordon<sup>2</sup>, Eleanor Barnes<sup>1,2,6</sup>, Susanna J Dunachie<sup>1,2</sup>, Katie  
12 Jeffery<sup>2,4</sup>, David W Eyre<sup>2,3,5,6,7§</sup>, Anne-Marie O'Donnell<sup>5,8§</sup>  
13  
14

15  
16 \* contributed equally

17  
18 § contributed equally  
19

20  
21  
22  
23 <sup>1</sup> Nuffield Department of Medicine, University of Oxford, Oxford, UK

24  
25 <sup>2</sup> Oxford University Hospitals, Oxford, UK

26  
27 <sup>3</sup> Big Data Institute, University of Oxford, Oxford, UK

28  
29 <sup>4</sup> Radcliffe Department of Medicine, University of Oxford, Oxford, UK

30  
31 <sup>5</sup> Nuffield Department of Population Health, University of Oxford, Oxford, UK

32  
33 <sup>6</sup> NIHR Oxford Biomedical Research Centre, University of Oxford, Oxford, UK

34  
35  
36  
37 <sup>7</sup> NIHR Health Protection Research Unit in Healthcare Associated Infections and Antimicrobial  
38 Resistance at University of Oxford in partnership with Public Health England, Oxford, UK

39  
40  
41 <sup>8</sup> Oxford Health NHS Foundation Trust, Oxford, UK  
42  
43  
44

45 Corresponding author:

46  
47 Dr David Eyre,

48  
49 david.eyre@bdi.ox.ac.uk

50  
51  
52 +44 (0)1865 221081  
53

54  
55 Microbiology Department, John Radcliffe Hospital, Headley Way, Oxford, OX3 9DU  
56  
57  
58  
59  
60

## Abstract

**Objectives:** To examine antibody responses after the second vaccination in healthcare workers (HCWs) with underlying health conditions.

**Methods:** We examined the peak anti-spike IgG responses after the second vaccination in 1,635 UK HCWs and associations with underlying health conditions and the estimated risk of severe COVID using an occupational health risk assessment tool. We used univariable and multivariable linear regression models to investigate associations between antibody levels and demographics (age, sex, ethnicity), health care role, body mass index, underlying health conditions, vaccination status, prior infection, and the Association of Local Authority Medical Advisors COVID-age risk score.

**Results:** 1,635 HCWs had anti-spike IgG measurements 14-84 days post second vaccination and data on any underlying health conditions. Only 5 HCWs (0.3%), all on immunosuppressive treatment, (including 4 organ transplant recipients), did not seroconvert after second vaccination. Antibody levels were independently lower with older age, diabetes, immunosuppression, respiratory disorders other than asthma, and markedly so in organ transplant recipients. Levels were independently lower in ChAdOx1 vs. BNT162b2 recipients and higher following previous infection. HCWs with 'very high' COVID-age risk scores had lower median antibody levels than those with 'low', 'medium' or 'high' risk scores; 4,379 AU/ml, compared with 12,337 AU/ml, 9,430 AU/ml, and 10,524 AU/ml respectively.

**Conclusions:** Two vaccine doses are effective in generating antibody responses among HCWs, including those with a high occupational risk. However, HCWs with underlying health conditions, especially diabetes, immunosuppression, and organ transplant, had lower antibody levels, and vaccine response monitoring may be needed.

### Strengths and limitations of this study

- The study focuses on antibody levels post vaccination in healthcare workers (HCWs) with underlying health conditions.
- The study examines the association between the Association of Local Authority Medical Advisors COVID-age tool and vaccine response.
- The study only examines the peak anti-spike IgG levels after the second vaccination and does not assess antibody waning longitudinally.

- 1
  - 2
  - 3
  - 4
  - 5
  - 6
  - 7
  - 8
  - 9
  - 10
  - 11
  - 12
  - 13
  - 14
  - 15
  - 16
  - 17
  - 18
  - 19
  - 20
  - 21
  - 22
  - 23
  - 24
  - 25
  - 26
  - 27
  - 28
  - 29
  - 30
  - 31
  - 32
  - 33
  - 34
  - 35
  - 36
  - 37
  - 38
  - 39
  - 40
  - 41
  - 42
  - 43
  - 44
  - 45
  - 46
  - 47
  - 48
  - 49
  - 50
  - 51
  - 52
  - 53
  - 54
  - 55
  - 56
  - 57
  - 58
  - 59
  - 60
- The study may not be widely generalizable given the study population is predominantly working-age HCWs.

For peer review only

1  
2  
3 Word count: 3490  
4  
5  
6  
7

## 8 Introduction 9

10 Healthcare workers (HCWs) have played a central role in the response to the severe acute  
11 respiratory syndrome coronavirus 2 (SARS-CoV-2) global pandemic. In many settings HCWs have  
12 been shown to be at an increased risk of SARS-CoV-2 infection, with risks relating both to proximity  
13 to infected patients and also to increased contact with colleagues compared with those working  
14 from home<sup>1-3</sup>.  
15  
16  
17  
18

19 Several interventions have been made to protect HCWs, including risk assessments, improved access  
20 to personal protective equipment (PPE) and training, better understanding of effective PPE selection,  
21 and modifications to working environments including social distancing and improved ventilation.  
22 One widely used UK tool that has been developed to assist in SARS-CoV-2 occupational health risk  
23 assessments is the Association of Local Authority Medical Advisors (ALAMA) COVID-age score<sup>4</sup>,  
24 which uses demographic and medical history factors to estimate the risk of death if a HCW were to  
25 become infected. For those at the highest risk, restriction of patient contact or alternative working  
26 patterns may be recommended.  
27  
28  
29  
30  
31  
32

33 Additionally, multiple vaccines have been developed that show good protection against COVID-19  
34 infection, hospitalisation, and death<sup>5-8</sup>, including in studies specifically looking at HCWs. Vaccination  
35 therefore plays an important role in facilitating those HCWs at higher risk of adverse outcomes from  
36 infection to remain in their usual work. Some HCWs, however, may not generate protective  
37 immunity following vaccination because of underlying medical conditions, especially those at the  
38 highest risk of adverse outcomes.  
39  
40  
41  
42  
43

44 One potential way to assess which HCWs have responded to vaccination is to look at their antibody  
45 levels post vaccination. Various studies have examined antibody responses in HCWs, including  
46 looking at the duration, magnitude, and response trajectories<sup>9-12</sup>, to understand the level of  
47 protection induced from vaccination, and its association with age, sex, and ethnicity<sup>13</sup>. However, few  
48 studies have examined the antibody responses in HCWs with underlying comorbidities. In particular,  
49 the association between estimated vulnerability of HCWs and antibody response to vaccination has  
50 not been studied.  
51  
52  
53  
54  
55

56 Here we report findings from a retrospective observational study looking at anti-spike IgG antibody  
57 responses post second COVID-19 vaccination in HCWs with underlying health conditions, specifically  
58  
59  
60

1  
2  
3 focusing on the association between peak antibody levels with the pre-existing underlying health  
4 conditions.  
5  
6  
7  
8  
9

## 10 Methods

### 11 Participants and settings

12  
13  
14 Oxford University Hospitals (OUH) consists of 4 teaching hospitals in Oxfordshire UK, providing acute  
15 and specialist services and employing 13,500 staff. OUH offered vaccination to all HCWs. The  
16 programme began on 8-December-2020, initially prioritising those at highest risk of severe COVID,  
17 starting with the Pfizer-BioNTech BNT162b2 vaccine, with Oxford-AstraZeneca ChAdOx1 nCoV-19  
18 added from 4 January 2021 and predominately provided to all staff at one acute hospital. Some  
19 HCWs received the Oxford-AstraZeneca vaccine in clinical trials beginning 23 April 2020 and were  
20 included following unblinding if receiving active vaccine.  
21  
22  
23  
24  
25

26  
27 OUH has offered SARS-CoV-2 testing to all symptomatic and asymptomatic staff. SARS-CoV-2 PCR  
28 testing of combined nasal and oropharyngeal swabs for symptomatic staff (those with a new  
29 persistent cough, temperature  $\geq 37.8^{\circ}\text{C}$ , anosmia, or ageusia) was offered from 27 March 2020  
30 onwards. Asymptomatic HCWs were invited to participate in voluntary nasal and oropharyngeal  
31 swab PCR testing and serologic testing from 23 April 2020 to 30 June 2021, as previously  
32 described<sup>9,14</sup>. All swabbing was performed by trained staff rather than self-administered. Additional  
33 serological testing of HCWs was undertaken by the Occupational Health department based on  
34 clinical assessment (results are included from 9 April 2020 onwards).  
35  
36  
37  
38  
39

40  
41 For occupational health purposes, all HCWs were asked to complete an individual COVID-19 risk  
42 assessment and those with underlying health conditions had more detailed risk assessments  
43 undertaken by the Occupational Health department. Staff members completed an online  
44 questionnaire about their age, sex, ethnicity, body mass index (BMI), underlying health conditions,  
45 smoking and pregnancy status, vaccination details, job role and location. COVID-age risk scores<sup>4</sup>  
46 were calculated based on this information to enable an appropriate risk assessment to be made by  
47 the Occupational Health team.  
48  
49  
50  
51  
52

53  
54 A total of 5,968 HCWs had serological data available between 9 April 2020 and 26 August 2021,  
55 among which 2,878 received two vaccinations. 1,635 HCWs had anti-spike IgG measurements post  
56 second vaccination and provided data on any underlying health conditions; these HCWs were  
57 included in the study (Figure S1).  
58  
59  
60

### Laboratory tests

Post-vaccination anti-trimeric spike IgG antibody levels were measured using the Abbott SARS-CoV-2 IgG II Quant antibody test (Abbott, Maidenhead, UK) targeting the spike receptor binding domain (RBD), with the cut-off of  $\geq 50$  AU/mL reported as positive and a linear quantification of detected results from 50 to 40,000 AU/mL<sup>15</sup>. Anti-spike IgG levels above 40,000 AU/ml were truncated at 40,000 AU/ml. The conversion between AU/ml and BAU/mL provided by the manufacturer is: 7 AU/ml = 1 BAU/mL. Pre-vaccination anti-nucleocapsid IgG levels were measured using the Abbott Architect i2000 chemiluminescent microparticle immunoassay (CMIA; Abbott, Maidenhead, UK), with antibody levels  $\geq 1.40$  manufacturer's arbitrary units reported as positive. Pre-vaccination anti-trimeric-spike IgG levels were measured using an enzyme-linked immunosorbent assay (ELISA) developed by the University of Oxford<sup>16</sup>, with  $\geq 8$  million units reported as positive.

PCR was performed using the Public Health England SARS-CoV-2 assay (targeting the RdRp gene) or one of five commercial assays: Abbott RealTime (targeting RdRp and N genes; Abbott, Maidenhead, UK), Altona RealStar (targeting E and S genes; Altona Diagnostics, Liverpool, UK), Cepheid Xpert<sup>®</sup> Xpress SARS-CoV-2 (targeting N2 and E; Cepheid, California, USA), BioFire<sup>®</sup> Respiratory 2.1 (RP2.1) panel with SARS-CoV-2 (targeting ORF1ab and ORF8; Biofire diagnostics, Utah, USA), Thermo Fisher TaqPath assay (targeting S and N genes, and ORF1ab; Thermo Fisher, Abingdon, UK) or using the ABI 7500 platform (Thermo Fisher, Abingdon, UK) with the US Centers for Disease Control and Prevention Diagnostic Panel of two probes targeting the N gene.

### Outcome

We included HCWs aged 17-77 years who completed an occupational health risk assessment, received a two-vaccination course, and had antibody measurements after their second vaccination. The vaccination type was divided into a homologous ChAdOx1 course, homologous BNT162b2 course, and other vaccine types or mixed vaccination.

We used the peak antibody level 14-84 days post second vaccination as the outcome. Antibody response was divided into three groups: high response (peak anti-spike IgG level  $>700$  AU/ml, converted from 100 BAU/mL which is associated with 67% protection against Delta infection<sup>17</sup>), low response (50-700 AU/ml), and no response ( $<50$  AU/ml).

Antibody measurements after breakthrough infections post first vaccination were excluded from the analysis: 26 HCWs had evidence of infection at least 14 days after their first vaccination but prior to their second vaccination, and 37 HCWs had evidence of infection at least 14 days after their second vaccination.

## Covariates

HCW's sex (grouped into male, female and non-disclosed), ethnicity (White, Asian, Black, Mixed, Other, and not stated), BMI (<16, 16-24.9, 25-29.9, 30-34.9, 35-39.9 and 40+) were included. Job role was grouped into nurse or healthcare assistant, doctor, administrative staff, physical, occupational, or speech therapist, laboratory staff, porter or domestic worker, medical or nursing student, or 'other', which included security, estates, catering staff, pharmacists, midwives, and other allied healthcare professionals.

Medical conditions and other potential risk factors included in the analysis were smoking and pregnancy status, and whether each HCW had asthma, hypertension, a thyroid disorder excluding malignancy, diabetes, immunosuppression, psoriasis, heart disease, a non-haematological malignancy, a rheumatological disorder, a respiratory disease other than asthma, a haematological disease excluding malignancy, liver disease, a neurological disorder, chronic kidney disease stage 3, 4 or 5, lupus, a splenic disorder excluding traumatic splenectomy, a haematological malignancy, and an organ transplant. Prior infection was defined as having had a positive PCR result or a positive anti-spike antibody result or a positive anti-nucleocapsid antibody result before the first vaccination dose.

The ALAMA COVID-age risk score was calculated based on age, sex, ethnicity, and presence of comorbidities. It estimates the probability of death should infection occur in the absence of vaccination or previous infection. We used the COVID-age risk score as a proxy for HCW's vulnerability to a poor outcome following SARS-CoV-2 infection and examined its association with antibody levels. A score  $\geq 85$  indicates very high vulnerability, 70-84 high vulnerability, 50-69 moderate vulnerability, and  $< 50$  low vulnerability. Details of the calculation formula and methods can be found online<sup>4</sup>.

## Statistical analysis

We first used the Kruskal-Wallis rank test to compare the outcome by different covariate groups. We then built univariable and multivariable linear regression models to examine the association between the outcome on the  $\log_{10}$  scale and demographics (age, sex, ethnicity), health care role, BMI, underlying health conditions, vaccination status, prior infection, and COVID-age risk score. Age was truncated at the 2.5<sup>th</sup> and 97.5<sup>th</sup> percentile to avoid undue outlier influence and modelled with and without natural cubic splines to test for the non-linear effects. For the multivariable model, backward elimination was used and the model with the lowest Akaike information criteria (AIC) was

1  
2  
3 selected. COVID-age score was not included in the multivariable model as it is based on other factors  
4 already included in the model.  
5

6  
7 All analyses were performed in R (version 4.1), using the following packages: tidyverse (version  
8 1.3.1), splines (version 4.0.5), and stats (version 4.0.5).  
9

### 10 **Patient and public involvement**

11  
12 The oversight committee of the research database used by the study has patient and public  
13 representation who participated in reviewing and approving a study summary and analysis plan.  
14  
15  
16

## 17 **Results**

18  
19 Among 1,635 HCWs, the median (IQR) [range] age was 46 (33-56) [17-77]. 1,344 (82.2%) were  
20 female, 1,169 (71.5%) were of white ethnicity, and 779 (47.6%) worked in a nursing or health-care  
21 assistant role. 872 (53.3%) did not have any underlying medical condition. The proportion reporting  
22 each condition ranged from 0.2% to 19.3%, with asthma being the most common comorbidity. 286  
23 (17.5%) HCWs had evidence of infection prior to their first vaccination. The median (IQR) [range]  
24 COVID-age score was 50 (35-59) [16-124], with 120 (7.5%) and 22 (1.4%) HCWs falling in the 'High'  
25 and 'Very high' risk groups, respectively. 1,234 (75.5%) and 387 (23.7%) HCWs received two  
26 BNT162b2 and ChAdOx1 vaccinations, respectively, and 13 HCWs (0.8%) received other  
27 combinations, including mRNA-1273 (**Table 1, 2**). The characteristics were generally similar to the  
28 larger group of 5,968 HCWs with serological data, so the cohort included in the analysis should be  
29 representative (**Table S1**).  
30  
31  
32

33  
34 Among 1,635 HCWs, the median (IQR) peak anti-spike binding antibody level 14-84 days post second  
35 vaccination was 10,763 (3,925-22,017) AU/ml. The distribution of peak antibody levels is shown in  
36 **Figure S2**. Observed antibody levels were different across age groups, health care roles, vaccination  
37 types, with or without evidence of prior infection, and COVID-age scores ( $p < 0.001$ ). HCWs with 'Very  
38 high' vulnerability according to COVID-age scores had the lowest median level of 4,379 AU/ml,  
39 compared with 12,337 AU/ml, 9,430 AU/ml, and 10,524 AU/ml in the 'Low', 'Moderate', and 'High'  
40 vulnerability groups (**Table 1, Figure 1a**). HCWs with medical conditions and other risk factors had  
41 lower median antibody levels than those without (9,637 AU/ml vs. 11,681 AU/ml,  $p = 0.009$ );  
42 specifically, antibody levels were lower in smokers (7,588 AU/ml,  $p = 0.003$ ), those with hypertension  
43 (8,770 AU/ml,  $p = 0.01$ ), diabetes (8,748 AU/ml,  $p = 0.04$ ), immunosuppression (7,451 AU/ml,  $p = 0.002$ ),  
44 a respiratory disease other than asthma (6,993 AU/ml,  $p = 0.01$ ), and those who had an organ  
45  
46  
47  
48  
49  
50  
51  
52  
53  
54  
55  
56  
57  
58  
59  
60



1  
2  
3 transplant (11 AU/ml,  $p < 0.001$ ) (**Table 2, Figure 1b**). There was no evidence of an association  
4  
5 between pregnancy and antibody levels (14,684 AU/ml,  $p = 0.6$ ).  
6  
7  
8  
9  
10  
11  
12  
13  
14  
15  
16  
17  
18  
19  
20  
21  
22  
23  
24  
25  
26  
27  
28  
29  
30  
31  
32  
33  
34  
35  
36  
37  
38  
39  
40  
41  
42  
43  
44  
45  
46  
47  
48  
49  
50  
51  
52  
53  
54  
55  
56  
57  
58  
59  
60

For peer review only

|                                   | Total (n=1,635) | Peak antibody levels >700 AU/ml (n=1,555) | Peak antibody levels 50-700 AU/ml (n=75) | Peak antibody levels <50 AU/ml (n=5) | Peak antibody levels 14-84 days post second vaccination (AU/ml) |                |                  |
|-----------------------------------|-----------------|-------------------------------------------|------------------------------------------|--------------------------------------|-----------------------------------------------------------------|----------------|------------------|
|                                   |                 |                                           |                                          |                                      | Median                                                          | IQR            | p value          |
| <b>Age (years)</b>                |                 |                                           |                                          |                                      |                                                                 |                |                  |
| <b>Median</b>                     | 46              | 46                                        | 49                                       | 34                                   | (Overall) 10,763                                                | 3,925-22,017   |                  |
| <b>Q1, Q3</b>                     | 33, 56          | 33, 56                                    | 36, 56                                   | 33, 43                               |                                                                 |                |                  |
| <b>Age group</b>                  |                 |                                           |                                          |                                      |                                                                 |                |                  |
| <b>17-34</b>                      | 457 (100.0%)    | 439 (96.1%)                               | 15 (3.3%)                                | 3 (0.7%)                             | 14,668                                                          | 5,359-25,801   | <b>&lt;0.001</b> |
| <b>35-54</b>                      | 723 (100.0%)    | 682 (94.3%)                               | 39 (5.4%)                                | 2 (0.3%)                             | 10,153                                                          | 3,773-20,578   |                  |
| <b>55-77</b>                      | 455 (100.0%)    | 434 (95.4%)                               | 21 (4.6%)                                | 0 (0.0%)                             | 9,328                                                           | 3,461-19,046   |                  |
| <b>Sex</b>                        |                 |                                           |                                          |                                      |                                                                 |                |                  |
| <b>Female</b>                     | 1,344 (100.0%)  | 1,271 (94.6%)                             | 68 (5.1%)                                | 5 (0.4%)                             | 10,779                                                          | 3,856 – 22,541 | 0.7              |
| <b>Male</b>                       | 290 (100.0%)    | 283 (97.6%)                               | 7 (2.4%)                                 | 0 (0.0%)                             | 10,710                                                          | 4,524 – 19,026 |                  |
| <b>Non-disclosed</b>              | 1 (100.0%)      | 1 (100.0%)                                | 0 (0.0%)                                 | 0 (0.0%)                             | 5,438                                                           |                |                  |
| <b>Ethnicity</b>                  |                 |                                           |                                          |                                      |                                                                 |                |                  |
| <b>White</b>                      | 1,169 (100.0%)  | 1,110 (95.0%)                             | 56 (4.8%)                                | 3 (0.3%)                             | 10,971                                                          | 3,907 – 22,009 | 0.3              |
| <b>Asian</b>                      | 304 (100.0%)    | 290 (95.4%)                               | 14 (4.6%)                                | 0 (0.0%)                             | 10,433                                                          | 4,180 – 21,829 |                  |
| <b>Black</b>                      | 50 (100.0%)     | 45 (90.0%)                                | 4 (8.0%)                                 | 1 (2.0%)                             | 7,081                                                           | 2,104 – 14,388 |                  |
| <b>Mixed</b>                      | 36 (100.0%)     | 36 (100.0%)                               | 0 (0.0%)                                 | 0 (0.0%)                             | 10,725                                                          | 4,573 – 29,932 |                  |
| <b>Other</b>                      | 55 (100.0%)     | 53 (96.4%)                                | 1 (1.8%)                                 | 1 (1.8%)                             | 8,581                                                           | 4,703 – 20,589 |                  |
| <b>Not stated</b>                 | 21 (100.0%)     | 21 (100.0%)                               | 0 (0.0%)                                 | 0 (0.0%)                             | 15,786                                                          | 5,686 – 25,064 |                  |
| <b>Role</b>                       |                 |                                           |                                          |                                      |                                                                 |                | <b>&lt;0.001</b> |
| <b>Administrative Staff</b>       | 245 (100.0%)    | 236 (96.3%)                               | 8 (3.3%)                                 | 1 (0.4%)                             | 11,653                                                          | 5,660 – 15,013 |                  |
| <b>Doctor</b>                     | 106 (100.0%)    | 102 (96.2%)                               | 4 (3.8%)                                 | 0 (0.0%)                             | 12,003                                                          | 6,677 – 22,113 |                  |
| <b>Laboratory Staff</b>           | 61 (100.0%)     | 58 (95.1%)                                | 2 (3.3%)                                 | 1 (1.6%)                             | 20,279                                                          | 8,790 – 31,137 |                  |
| <b>Medical or nursing Student</b> | 12 (100.0%)     | 12 (100.0%)                               | 0 (0.0%)                                 | 0 (0.0%)                             | 7,933                                                           | 6,061 – 20,103 |                  |
| <b>Nurse/HCA</b>                  | 779 (100.0%)    | 737 (94.6%)                               | 39 (5.0%)                                | 3 (0.4%)                             | 10,844                                                          | 3,897 – 21,515 |                  |

|                                                   |                |               |            |          |        |                |
|---------------------------------------------------|----------------|---------------|------------|----------|--------|----------------|
| <b>Other</b>                                      | 331 (100.0%)   | 314 (94.9%)   | 17 (5.1%)  | 0 (0.0%) | 9,208  | 2,533 – 20,284 |
| <b>Porter or domestic worker</b>                  | 31 (100.0%)    | 27 (87.1%)    | 4 (12.9%)  | 0 (0.0%) | 8,476  | 1,533 – 15,644 |
| <b>OT/PT/SLT</b>                                  | 70 (100.0%)    | 69 (98.6%)    | 1 (1.4%)   | 0 (0.0%) | 11,849 | 6,021 – 24,371 |
| <b>BMI</b>                                        |                |               |            |          |        | 0.3            |
| <b>&lt;16</b>                                     | 3 (100.0%)     | 2 (66.7%)     | 1 (33.3%)  | 0 (0.0%) | 17,716 | 9,195 – 18,471 |
| <b>16-24.9</b>                                    | 698 (100.0%)   | 667 (95.6%)   | 28 (4.0%)  | 3 (0.4%) | 11,587 | 4,186 – 22,134 |
| <b>25-29.9</b>                                    | 517 (100.0%)   | 491 (95.0%)   | 24 (4.6%)  | 2 (0.4%) | 10,169 | 3,404 – 19,046 |
| <b>30-34.9</b>                                    | 261 (100.0%)   | 247 (94.6%)   | 14 (5.4%)  | 0 (0.0%) | 10,149 | 4,318 – 24,585 |
| <b>35-39.9</b>                                    | 85 (100.0%)    | 81 (95.3%)    | 4 (4.7%)   | 0 (0.0%) | 10,743 | 4,534 – 27,281 |
| <b>&gt;40</b>                                     | 71 (100.0%)    | 67 (94.4%)    | 4 (5.6%)   | 0 (0.0%) | 11,199 | 5,877 – 28,260 |
| <b>Vaccine combination</b>                        |                |               |            |          |        | <0.001         |
| <b>ChAdOx1/ChAdOx1</b>                            | 387 (100.0%)   | 315 (81.4%)   | 70 (18.1%) | 2 (0.5%) | 1,603  | 879 – 3,521    |
| <b>BNT162b2/BNT162b2</b>                          | 1,234 (100.0%) | 1,227 (99.4%) | 4 (0.3%)   | 3 (0.2%) | 14,824 | 8,432 – 25,853 |
| <b>Other</b>                                      | 13 (100.0%)    | 13 (100.0%)   | 1 (0.0%)   | 0 (0.0%) | 6,993  | 4,693 – 13,212 |
| <b>Evidence of Covid-19 infection at baseline</b> |                |               |            |          |        | <0.001         |
| <b>No</b>                                         | 1,349 (100.0%) | 1,269 (94.1%) | 75 (5.6%)  | 5 (0.4%) | 9,960  | 3,302-20,056   |
| <b>Yes</b>                                        | 286 (100.0%)   | 286 (100.0%)  | 0 (0.0%)   | 0 (0.0%) | 17,227 | 7,111 – 28,277 |
| <b>COVID-age score groups</b>                     |                |               |            |          |        | <0.001         |
| <b>Low</b>                                        | 769 (100.0%)   | 737 (95.8%)   | 32 (4.2%)  | 0 (0.0%) | 12,337 | 4,634-23,170   |
| <b>Medium</b>                                     | 696 (100.0%)   | 659 (94.7%)   | 35 (5.0%)  | 2 (0.3%) | 9,430  | 3,693-19,302   |
| <b>High</b>                                       | 120 (100.0%)   | 114 (95.0%)   | 5 (4.2%)   | 1 (0.8%) | 10,524 | 3,106-23,939   |
| <b>Very high</b>                                  | 22 (100.0%)    | 17 (77.3%)    | 3 (13.6%)  | 2 (9.1%) | 4,379  | 889-11,214     |
| <b>COVID-age score</b>                            |                |               |            |          |        |                |
| <b>Median</b>                                     | 50             | 50            | 53         | 76       |        |                |
| <b>Q1, Q3</b>                                     | 35, 59         | 35, 60        | 36, 57     | 54, 85   |        |                |

**Table 1. Characteristics of the study population according to the peak anti-spike IgG levels post second vaccination.** Other for vaccine included mRNA-1273 and other vaccine combinations. OT/PT/SLT: occupational therapist, physiotherapist, and speech and language therapist. HCA: healthcare assistant.

1  
2  
3  
4  
5  
6  
7  
8  
9  
10  
11  
12  
13  
14  
15  
16  
17  
18  
19  
20  
21  
22  
23  
24  
25  
26  
27  
28  
29  
30  
31  
32  
33  
34  
35  
36  
37  
38  
39  
40  
41  
42  
43  
44  
45  
46

|                                                      | Total (n=1,635) | Peak antibody levels >700 AU/ml (n=1,555) | Peak antibody levels 50-700 AU/ml (n=75) | Peak antibody levels <50 AU/ml (n=5) | Peak antibody levels 14-84 days post second vaccination (AU/ml) |                | p value      |
|------------------------------------------------------|-----------------|-------------------------------------------|------------------------------------------|--------------------------------------|-----------------------------------------------------------------|----------------|--------------|
|                                                      |                 |                                           |                                          |                                      | Median                                                          | IQR            |              |
| <b>Comorbidity</b>                                   |                 |                                           |                                          |                                      |                                                                 |                | <b>0.009</b> |
| <b>No</b>                                            | 872 (100.0%)    | 830 (95.2%)                               | 42 (4.8%)                                | 0 (0.0%)                             | 11,681                                                          | 4,362 – 23,299 |              |
| <b>Yes</b>                                           | 763 (100.0%)    | 725 (95.0%)                               | 33 (4.3%)                                | 5 (0.7%)                             | 9,637                                                           | 3,493-19,750   |              |
| <b>Smoking</b>                                       | 106 (100.0%)    | 99 (93.4%)                                | 7 (6.6%)                                 | 0 (0.0%)                             | 7,588                                                           | 1,828 – 19,639 | <b>0.003</b> |
| <b>Pregnant</b>                                      | 23 (100.0%)     | 23 (100.0%)                               | 0 (0.0%)                                 | 0 (0.0%)                             | 14,684                                                          | 8,199 – 19,453 | 0.6          |
| <b>Asthma</b>                                        | 316 (100.0%)    | 300 (94.9%)                               | 16 (5.1%)                                | 0 (0.0%)                             | 10,161                                                          | 4,296 – 19,559 | 0.2          |
| <b>Hypertension</b>                                  | 176 (100.0%)    | 168 (95.5%)                               | 8 (4.5%)                                 | 0 (0.0%)                             | 8,770                                                           | 3,272 - 18,746 | <b>0.01</b>  |
| <b>Thyroid disorder (excluding malignancy)</b>       | 137 (100.0%)    | 128 (93.4%)                               | 9 (6.6%)                                 | 0 (0.0%)                             | 10,395                                                          | 3,280 – 25,672 | 0.9          |
| <b>Diabetes</b>                                      | 95 (100.0%)     | 89 (93.7%)                                | 5 (5.3%)                                 | 1 (1.1%)                             | 8,748                                                           | 2,950 – 19,346 | <b>0.04</b>  |
| <b>Immunosuppression</b>                             | 80 (100.0%)     | 68 (85.0%)                                | 7 (8.8%)                                 | 5 (6.2%)                             | 7,451                                                           | 1,503 – 17,695 | <b>0.002</b> |
| <b>Psoriasis</b>                                     | 48 (100.0%)     | 43 (89.6%)                                | 5 (10.4%)                                | 0 (0.0%)                             | 7,435                                                           | 2,573 – 13,850 | 0.06         |
| <b>Heart disease</b>                                 | 34 (100.0%)     | 32 (94.1%)                                | 2 (5.9%)                                 | 0 (0.0%)                             | 13,925                                                          | 4,999 – 22,430 | 0.7          |
| <b>Non-haematological malignancy</b>                 | 41 (100.0%)     | 40 (97.6%)                                | 1 (2.4%)                                 | 0 (0.0%)                             | 13,159                                                          | 9,261 – 23,955 | 0.3          |
| <b>Rheumatological disorder</b>                      | 27 (100.0%)     | 24 (88.9%)                                | 2 (7.4%)                                 | 1 (3.7%)                             | 5,691                                                           | 1,770 – 15,567 | 0.05         |
| <b>Respiratory disease (excluding asthma)</b>        | 37 (100.0%)     | 33 (89.2%)                                | 4 (10.8%)                                | 0 (0.0%)                             | 6,993                                                           | 2,302 – 12,927 | <b>0.01</b>  |
| <b>Haematological disease (excluding malignancy)</b> | 36 (100.0%)     | 35 (97.2%)                                | 1 (2.8%)                                 | 0 (0.0%)                             | 12,236                                                          | 6,738 – 20,060 | 1            |
| <b>Liver disease</b>                                 | 11 (100.0%)     | 11 (100.0%)                               | 0 (0.0%)                                 | 0 (0.0%)                             | 11,419                                                          | 5,818 – 13,705 | 0.4          |
| <b>Neurological disorder</b>                         | 12 (100.0%)     | 12 (100.0%)                               | 0 (0.0%)                                 | 0 (0.0%)                             | 6,035                                                           | 5,258 – 12,886 | 0.3          |
| <b>CKD stage 3, 4 or 5</b>                           | 6 (100.0%)      | 5 (83.3%)                                 | 0 (0.0%)                                 | 1 (16.7%)                            | 10,129                                                          | 5,672 – 17,965 | 0.7          |

|                                                                   |            |            |           |           |       |                |                  |
|-------------------------------------------------------------------|------------|------------|-----------|-----------|-------|----------------|------------------|
| <b>Lupus</b>                                                      | 7 (100.0%) | 5 (71.4%)  | 1 (14.3%) | 1 (14.3%) | 1,478 | 695 – 13,582   | 0.1              |
| <b>Splenic disorder<br/>(excluding traumatic<br/>splenectomy)</b> | 4 (100.0%) | 4 (100.0%) | 0 (0.0%)  | 0 (0.0%)  | 1,796 | 1,040 – 9,695  | 0.2              |
| <b>Haematological<br/>malignancy</b>                              | 3 (100.0%) | 3 (100.0%) | 0 (0.0%)  | 0 (0.0%)  | 7,731 | 7,230 – 16,186 | 0.9              |
| <b>Organ transplant</b>                                           | 5 (100.0%) | 1 (20.0%)  | 0 (0.0%)  | 4 (80.0%) | 11    | 6 - 21         | <b>&lt;0.001</b> |

**Table 2. Comorbidity status of the study population according to the peak anti-spike IgG levels post second vaccination.** CKD: chronic kidney disease.

1  
2  
3 1,555 (95.1%) HCWs had a peak anti-spike IgG level >700 AU/ml, i.e. a level associated with >67%  
4 protection from infection (see Methods). 75 (4.6%) HCWs had a suboptimal antibody level between  
5 50 and 700 AU/ml, and 5 (0.3%) HCWs did not generate a positive antibody response (<50 AU/ml)  
6 after the second vaccination. Of the 75 and 5 HCWs with low or no antibody response, the median  
7 COVID-age risk score was 53 (IQR 36-57) and 76 (IQR 54-85) respectively - higher than in the high  
8 response group (50, IQR 35-60) ( $p=0.03$ ), but not sufficiently different for the low response group for  
9 COVID-age score alone to identify those likely to be in this group. Among the 80 HCWs with low or  
10 no antibody response, 72 received two ChAdOx1 vaccinations, accounting for 18.6% of all the  
11 ChAdOx1 recipients, whilst the proportion having a low response was only 0.5% of all the BNT162b2  
12 recipients (**Table 1**). HCWs with specific medical conditions were more likely to be in the low or no  
13 response groups including 15% of those reporting taking immunosuppression and several other  
14 conditions that may also be treated with immunosuppression, including low/no antibody responses in  
15 10% with psoriasis, 11% with rheumatological disorders, 11% with other (non-asthma) respiratory  
16 disorders, 29% with lupus, and 80% with an organ transplant. Of the 5 HCWs with no detectable  
17 serological response, all were female and immunosuppressed, 4 HCWs had had organ transplants  
18 and the other HCW having an autoimmune disease for which they received rituximab (**Table 2**).

19  
20 Associations between  $\log_{10}$  antibody levels and covariates in univariable linear regression models are  
21 shown in **Table 3**. Older age, black ethnicity, working as a porter or domestic worker, and receiving  
22 two ChAdOx1 vaccines were associated with lower peak anti-spike antibody levels 14-84 days post  
23 second vaccination. Smoking, diabetes, a respiratory disease other than asthma, chronic kidney  
24 disease stage 3, 4, or 5, a rheumatological disorder, lupus, being immunosuppressed, or having had  
25 an organ transplant were all associated with lower antibody levels. A higher COVID-age score, which  
26 indicated higher risk of mortality from infection, was also associated with lower antibody levels  
27 ( $p<0.001$ ). Having evidence of COVID-19 infection prior to vaccination, as well as being a laboratory  
28 staff worker, were both associated with having higher antibody levels. No evidence of an association  
29 was found between antibody levels and sex or BMI.

30  
31 1,593 HCWs with complete information on all variables were included in the multivariable model.  
32 The baseline intercept in  $\log_{10}$  scale was 4.25. Older age (-0.03 per 10 years older, 95% Confidence  
33 interval: -0.05, -0.01), diabetes (-0.14, 95%CI: -0.22, -0.05), a respiratory condition other than  
34 asthma (-0.17, 95%CI: -0.3, -0.04), an organ transplant (-2.66, 95%CI: -3.01, -2.31), being  
35 immunosuppressed (-0.22, 95%CI: -0.31, -0.13), and receiving two ChAdOx1 vaccinations (-0.91,  
36 95%CI: -0.96, -0.87) were all independently associated with lower peak spike antibody levels 14-84  
37 days post second vaccination. Having evidence of prior infection was associated with having higher  
38 antibody levels (0.29, 95%CI: 0.24, 0.34) (**Table 3**).

|                    |                            | Univariable  |              |        |       | Multivariable |                  |        |       |
|--------------------|----------------------------|--------------|--------------|--------|-------|---------------|------------------|--------|-------|
|                    |                            | Co-efficient | p-value      | 95% CI |       | Co-efficient  | p-value          | 95% CI |       |
| <b>Age</b>         | per 10 year older          | -0.034       | <b>0.002</b> | -0.06  | -0.01 | -0.03         | <b>&lt;0.001</b> | -0.05  | -0.01 |
| <b>Sex</b>         | Female                     | 1(ref)       |              |        |       |               |                  |        |       |
|                    | Male                       | 0.02         | 0.6          | -0.06  | 0.09  | -0.04         | 0.14             | -0.09  | 0.01  |
| <b>Ethnicity</b>   | White                      | 1(ref)       |              |        |       |               |                  |        |       |
|                    | Asian                      | 0.01         | 0.7          | -0.06  | 0.09  |               |                  |        |       |
|                    | Black                      | -0.22        | <b>0.009</b> | -0.38  | -0.05 |               |                  |        |       |
|                    | Mixed                      | 0.07         | 0.5          | -0.13  | 0.26  |               |                  |        |       |
|                    | Other                      | -0.07        | 0.4          | -0.23  | 0.09  |               |                  |        |       |
| <b>Role</b>        | Nurse / HCA                | 1(ref)       |              |        |       |               |                  |        |       |
|                    | Doctor                     | 0.1          | 0.1          | -0.02  | 0.22  |               |                  |        |       |
|                    | Administrative staff       | 0.07         | 0.1          | -0.01  | 0.15  |               |                  |        |       |
|                    | OT/PT/SLT                  | 0.11         | 0.1          | -0.03  | 0.26  |               |                  |        |       |
|                    | Laboratory staff           | 0.24         | <b>0.002</b> | 0.09   | 0.39  |               |                  |        |       |
|                    | Porter or domestic worker  | -0.23        | <b>0.03</b>  | -0.44  | -0.03 |               |                  |        |       |
|                    | Medical or nursing student | 0.07         | 0.7          | -0.26  | 0.4   |               |                  |        |       |
|                    | Other                      | -0.06        | 0.1          | -0.14  | 0.01  |               |                  |        |       |
| <b>BMI</b>         | <16                        | -0.13        | 0.7          | -0.8   | 0.53  |               |                  |        |       |
|                    | 16-24.9                    | 1(ref)       |              |        |       |               |                  |        |       |
|                    | 25-29.9                    | -0.06        | 0.1          | -0.12  | 0.01  |               |                  |        |       |
|                    | 30-34.9                    | 0.01         | 0.9          | -0.08  | 0.09  |               |                  |        |       |
|                    | 35-39.9                    | 0.01         | 0.9          | -0.12  | 0.14  |               |                  |        |       |
|                    | 40+                        | 0.05         | 0.5          | -0.09  | 0.19  |               |                  |        |       |
| <b>Comorbidity</b> | Yes vs. No                 |              |              |        |       |               |                  |        |       |
|                    | Smoking                    | -0.17        | <b>0.003</b> | -0.29  | -0.06 | -0.06         | 0.12             | -0.14  | 0.02  |
|                    | Pregnant                   | 0.13         | 0.3          | -0.11  | 0.37  |               |                  |        |       |
|                    | Asthma                     | 0.005        | 0.9          | -0.15  | 0.04  |               |                  |        |       |
|                    | Hypertension               | -0.06        | 0.2          | -0.15  | 0.03  | -0.06         | 0.09             | -0.12  | 0.01  |

|                        |                                                               |        |                  |       |       |       |                  |       |       |
|------------------------|---------------------------------------------------------------|--------|------------------|-------|-------|-------|------------------|-------|-------|
|                        | Thyroid disorder (excluding malignancy)                       | 0.01   | 0.9              | -0.09 | 0.11  | 0.05  | 0.13             | -0.02 | 0.12  |
|                        | Diabetes                                                      | -0.14  | <b>0.03</b>      | -0.26 | -0.01 | -0.14 | <b>&lt;0.001</b> | -0.22 | -0.05 |
|                        | Immunosuppression                                             | -0.38  | <b>&lt;0.001</b> | -0.51 | -0.25 | -0.22 | <b>&lt;0.001</b> | -0.31 | -0.13 |
|                        | Psoriasis                                                     | -0.13  | 0.1              | -0.3  | 0.04  |       |                  |       |       |
|                        | Heart disease                                                 | 0.05   | 0.6              | -0.14 | 0.25  |       |                  |       |       |
|                        | Non-haematological malignancy                                 | 0.14   | 0.1              | -0.04 | 0.32  | 0.13  | <b>0.04</b>      | 0.01  | 0.25  |
|                        | Rheumatological disorder                                      | -0.28  | <b>0.01</b>      | -0.5  | -0.06 |       |                  |       |       |
|                        | Respiratory disease (excluding asthma)                        | -0.22  | <b>0.02</b>      | -0.41 | -0.03 | -0.17 | <b>0.01</b>      | -0.3  | -0.04 |
|                        | Haematological disease (excluding malignancy)                 | 0.06   | 0.6              | -0.14 | 0.25  |       |                  |       |       |
|                        | Liver disease                                                 | -0.03  | 0.9              | -0.38 | 0.32  |       |                  |       |       |
|                        | Neurological disorder                                         | -0.001 | 0.9              | -0.33 | 0.33  |       |                  |       |       |
|                        | CKD stage 3, 4 or 5                                           | -0.84  | <b>&lt;0.001</b> | -1.3  | -0.37 |       |                  |       |       |
|                        | Lupus                                                         | -0.68  | <b>0.002</b>     | -1.1  | -0.24 |       |                  |       |       |
|                        | Splenic disorder (excluding traumatic splenectomy)            | -0.42  | 0.2              | -1    | 0.15  |       |                  |       |       |
|                        | Haematological malignancy                                     | 0.13   | 0.7              | -0.53 | 0.79  |       |                  |       |       |
|                        | Organ transplant                                              | -3.06  | <b>&lt;0.001</b> | -3.55 | -2.57 | -2.66 | <b>&lt;0.001</b> | -3.01 | -2.31 |
| <b>Vaccination</b>     | BNT162b2/BNT162b2                                             |        |                  |       |       |       |                  |       |       |
|                        | ChAdOx1/ChAdOx1                                               | -0.9   | <b>&lt;0.001</b> | -0.95 | -0.85 | -0.91 | <b>&lt;0.001</b> | -0.96 | -0.87 |
|                        | <b>Evidence of Covid-19 infection at baseline (Yes vs No)</b> | 0.25   | <b>&lt;0.001</b> | 0.18  | 0.33  | 0.29  | <b>&lt;0.001</b> | 0.24  | 0.34  |
| <b>COVID-age Score</b> | per 10 score higher                                           | -0.05  | <b>&lt;0.001</b> | -0.06 | -0.03 |       |                  |       |       |

**Table 3. Association between the peak anti-spike IgG antibody levels 14-84 days post second vaccination with each characteristic from the univariable model and multivariable model.** Bold indicates a significant p value <0.05. The outcome was modelled in log<sub>10</sub> scale. Variables in the multivariable model were selected using backward selection by Akaike Information Criteria (AIC). OT/PT/SLT: occupational therapist, physiotherapist, and speech and language therapist. HCA: healthcare assistant. CKD: chronic kidney disease.



## Discussion

While SARS-CoV-2 vaccination generates antibody responses for most HCWs, we found several risk factors associated with lower antibody levels after vaccination, including older age, diabetes, respiratory diseases other than asthma, being immunosuppressed, and having had an organ transplant. Given antibody levels are associated with vaccine efficacy and protection against SARS-CoV-2 infection<sup>18,19</sup>, HCWs with these risk factors could have a higher risk of infection. Infection before the first vaccination led to higher antibody levels post vaccination.

Only 5 (0.3%) HCWs did not seroconvert post second vaccination, which is a smaller proportion than the approximately 1% of the general population who do not seroconvert after two vaccinations<sup>17</sup>, and reflects the effectiveness of two vaccine doses in generating antibody responses in this population of predominantly healthy adults of working age.

Receiving two ChAdOx1 vaccine doses yielded lower antibody levels than receiving two BNT162b2 vaccine doses. Although this has been previously reported<sup>17</sup> and may not reflect overall vaccine effectiveness, it was potentially an important factor in many of the 75 (4.6%) HCWs with low antibody responses. These HCWs had peak antibody levels lower than the level associated with 67% protection against the Delta variant infection in a previous study (100 BAU/mL, 700 AU/ml)<sup>17</sup>. Further, with new variants circulating, such as Omicron, with higher antibody levels required for the same level of protection<sup>20,21</sup>, two doses of vaccination may not provide good levels of protection for this group.

Among the 80 HCWs who had no or low antibody response, most had underlying medical conditions, including immunosuppression or organ transplant, and 72 had received ChAdOx1 vaccination. These were also identified as the main risk factors for having lower antibody levels in the multivariable regression model, similar to previous studies reporting lower anti-spike IgG levels in HCWs with any comorbidity compared to healthy HCWs<sup>22</sup>, and low antibody levels or seroconversion rates in organ transplant or immunosuppressed patients<sup>23,24</sup>, leading to a higher risk of mortality following SARS-CoV-2 infection<sup>25,26</sup>. Therefore, it may be helpful to routinely assess post-vaccination antibody levels in HCWs with comorbidities, especially immunosuppression or organ transplantation. Booster mRNA vaccine doses should be prioritised for this population, in particular those with two prior ChAdOx1 doses, as evidence has shown that a third or fourth dose could significantly improve the suboptimal immune response in organ transplant recipients<sup>27-29</sup>.

Other comorbidities independently associated with lower antibody levels post vaccination were diabetes and respiratory diseases other than asthma. Antibody response and seropositivity rates in

1  
2  
3 diabetes patients were also found to be lower than in the healthy population after vaccination in a  
4 recent systematic review<sup>30</sup>. However, adequate glycaemic control after vaccination improved  
5 immunological responses and may even restore the protection against SARS-CoV-2 infection<sup>31</sup>. We  
6 did not find an association between peak antibody levels with BMI, but a study in Scotland suggested  
7 that obesity could lead to faster waning of immunity after vaccination, which may explain increased  
8 disease severity from breakthrough infections in people with obesity<sup>32</sup>. Previous studies also found  
9 that hypertension<sup>33</sup> and smoking<sup>34,35</sup> were associated with lower antibody responses post-  
10 vaccination; there was marginal evidence for a similar effect in our population ( $p=0.09$ ; 0.12).  
11  
12

13  
14  
15 We also examined the relationship between a COVID-age risk stratification score and vaccine  
16 response. The ALAMA COVID-age score is based on OpenSAFELY data<sup>4,36</sup> and assesses demographic  
17 and health-related risk factors to calculate personal vulnerability to COVID-19, which can be  
18 quantified as the probability of death should infection occur in the absence of vaccination or  
19 previous infection. In our cohort, 6-7% of HCWs had a high risk, and 1-2% of HCWs had a very high  
20 risk based on the scoring system. Overall higher risk groups had lower antibody levels post second  
21 vaccination. The COVID-age score can thus potentially be used to identify HCWs at risk of lower  
22 antibody levels. However, in most instances these were still at levels associated with high levels of  
23 protection against infection, with a median peak level of around 10,000 for the low to high-risk  
24 groups. The peak level was lower in the 'very high' risk group, but more than 75% of HCWs in this  
25 group still generated peak levels >700 AU/ml (associated with 67% protection against the Delta  
26 variant infection<sup>17</sup>). Therefore, vaccination (or previous infection) could provide good immunity and  
27 potentially reduce the personal vulnerability to COVID-19 for most HCWs. However, a small minority  
28 of HCWs may not be well protected by vaccination and these individuals are also potentially at  
29 higher risk of adverse outcomes if infected. Therefore, HCWs assessed as at 'very high' risk of more  
30 severe outcome from COVID infection who do not have a history of previous COVID infection should  
31 have further vaccine outcome assessment as part of their occupational risk assessment. In those  
32 with limited antibody responses, if these remain after booster vaccinations, it may be appropriate to  
33 put in place enhanced additional risk mitigations for those HCWs wishing to remain in their current  
34 role.  
35  
36  
37  
38  
39  
40  
41  
42  
43  
44  
45  
46  
47  
48  
49

50  
51 Limitations of this study include that we only examined the peak anti-spike IgG levels after the  
52 second vaccination and did not assess antibody waning longitudinally. We therefore did not assess  
53 antibody responses after a third booster dose, and this requires further study. We only measured  
54 anti-spike IgG levels using a single assay and did not measure neutralizing antibodies or T-cell  
55 responses. Vaccine induces a broad range of both B and T cell responses and measure of  
56 quantitative IgG antibody is only a surrogate for a broad range of immune response<sup>37</sup>. However, the  
57  
58  
59  
60

1  
2  
3 assay is commercially available and well-calibrated as previously described<sup>15</sup>, and neutralizing  
4 antibodies are strongly correlated with anti-spike antibodies<sup>17</sup>. The wider generalizability of the  
5 analyses is limited given the cohort included in this analysis was predominantly working-age HCWs  
6 with 82% being female and 72% of white ethnicity. However, this cohort had diverse health care  
7 roles and comorbidities and provides useful data for decision making related to HCWs. Future work  
8 with HCWs could focus on creating risk models that adjust for vaccination status, and ideally markers  
9 of vaccination response such as antibody levels.

10  
11 The study has several implications for occupational health assessment. Most HCWs seroconverted  
12 after their second vaccination including those who had a high risk of adverse outcomes from COVID-  
13 19, indicating that two vaccinations are generally effective in generating antibody responses among  
14 HCWs, such that large-scale antibody testing is not necessary. However, HCWs with 'very high'  
15 COVID-age risk score had lower antibody levels, suggesting the COVID-age tool may help to identify  
16 HCWs at risk of lower antibody levels and prioritise which HCWs require further assessment of  
17 vaccine responses. Multiple factors are associated with whether a HCW mounts a sufficient response  
18 to COVID vaccination. Assessment of these may be pertinent to decisions regarding workplace  
19 controls to support HCWs at high risk working safely. Given the high exposure to SARS-CoV-2,  
20 routine antibody assessments among high-risk HCWs, such as immunosuppressed patients or organ  
21 transplant recipients, could be important, and further booster vaccinations should be prioritised for  
22 these groups to improve their immune response alongside careful use of other protective measures.  
23  
24  
25  
26  
27  
28  
29  
30  
31  
32  
33  
34  
35  
36  
37  
38  
39  
40  
41  
42

## 43 Ethics Approval

44  
45 Following approval from the OUH's Caldicott guardian, deidentified data were obtained from the  
46 Infections in Oxfordshire Research Database (IORD), which has approvals from the National Research  
47 Ethics Service South Central – Oxford C Research Ethics Committee (19/SC/0403), the Health  
48 Research Authority and the national Confidentiality Advisory Group (19/CAG/0144).  
49  
50  
51  
52  
53  
54

## 55 Contribution statement

56  
57 The study was designed and planned by WG, EB, SD, KJ, DWE, and AO. This specific analysis was  
58 designed by VW, JW, and DWE. VW and JW contributed to the statistical analysis of the data. VW,  
59  
60

JW, DWE, and AO drafted the manuscript and all authors contributed to interpretation of the data and results and revised the manuscript. All authors approved the final version of the manuscript.

## Competing Interests statement

DWE declares lecture fees from Gilead, outside the submitted work. No other author has a conflict of interest to declare.

## Funding

This work was supported by the National Institute for Health Research Health Protection Research Unit (NIHR HPRU) in Healthcare Associated Infections and Antimicrobial Resistance at Oxford University in partnership with the UK Health Security Agency (NIHR200915), and the NIHR Biomedical Research Centre, Oxford. EB is an NIHR Senior Investigator. SJD is funded by an NIHR Global Research Professorship (NIHR300791). DWE is a Big Data Institute Robertson Fellow. The views expressed are those of the authors and not necessarily those of the NHS, the NIHR, the Department of Health or the UK Health Security Agency. The funders had no role in study design, data collection and analysis, decision to publish, or preparation of the manuscript.

## Data sharing statement

The data analysed during the current study are not publicly available as they contain personal data but are available from the Infections in Oxfordshire Research Database (<https://oxfordbrc.nihr.ac.uk/research-themes-overview/antimicrobial-resistance-and-modernising-microbiology/infections-in-oxfordshire-research-database-iord/>), subject to an application and research proposal meeting the ethical and governance requirements of the Database.

## Acknowledgement

This work uses data provided by healthcare workers and collected by the UK's National Health Service as part of their care and support. We thank all the people of Oxfordshire who contribute to the Infections in Oxfordshire Research Database.

1  
2  
3 Research Database Team: L Butcher, H Boseley, C Crichton, DW Crook, D Eyre, O Freeman, J Gearing  
4 (community), R Harrington, K Jeffery, M Landray, A Pal, TEA Peto, TP Quan, J Robinson (community),  
5 J Sellors, B Shine, AS Walker, D Waller. Patient and Public Panel: G Blower, C Mancey, P McLoughlin,  
6  
7 B Nichols.  
8  
9  
10  
11  
12  
13  
14  
15

## 16 References

- 17 1. Eyre, D. W. *et al.* Differential occupational risks to healthcare workers from SARS-CoV-2  
18 observed during a prospective observational study. *Elife* **9**, 1–37 (2020).
- 19 2. Platten, M. *et al.* Cumulative Incidence of SARS-CoV-2 in Healthcare Workers at a General  
20 Hospital in Germany during the Pandemic-A Longitudinal Analysis. *Int J Environ Res Public*  
21 *Health* **19**, (2022).
- 22 3. Szajek, K. *et al.* Healthcare institutions' recommendation regarding the use of FFP-2 masks  
23 and SARS-CoV-2 seropositivity among healthcare workers: a multicenter longitudinal cohort  
24 study. *Antimicrob Resist Infect Control* **11**, 6 (2022).
- 25 4. Covid-19 Medical Risk Assessment – Alama. [https://alama.org.uk/covid-19-medical-risk-](https://alama.org.uk/covid-19-medical-risk-assessment/)  
26 [assessment/](https://alama.org.uk/covid-19-medical-risk-assessment/).
- 27 5. Bernal, J. L. *et al.* Effectiveness of the Pfizer-BioNTech and Oxford-AstraZeneca vaccines on  
28 covid-19 related symptoms, hospital admissions, and mortality in older adults in England: test  
29 negative case-control study. *BMJ* **373**, (2021).
- 30 6. Polack, F. P. *et al.* Safety and Efficacy of the BNT162b2 mRNA Covid-19 Vaccine. *N Engl J Med*  
31 **383**, 2603–2615 (2020).
- 32 7. Shrotri, M. *et al.* Vaccine effectiveness of the first dose of ChAdOx1 nCoV-19 and BNT162b2  
33 against SARS-CoV-2 infection in residents of long-term care facilities in England (VIVALDI): a  
34 prospective cohort study. *Lancet Infect Dis* (2021) doi:10.1016/S1473-3099(21)00289-9.
- 35 8. Feikin, D. R. *et al.* Duration of effectiveness of vaccines against SARS-CoV-2 infection and  
36 COVID-19 disease: results of a systematic review and meta-regression. *Lancet* **399**, (2022).
- 37 9. Lumley, S. F. *et al.* The Duration, Dynamics, and Determinants of Severe Acute Respiratory  
38 Syndrome Coronavirus 2 (SARS-CoV-2) Antibody Responses in Individual Healthcare Workers.  
39 *Clinical Infectious Diseases* **73**, e699–e709 (2021).
- 40 10. Çağlayan, D. *et al.* An analysis of antibody response following the second dose of CoronaVac  
41 and humoral response after booster dose with BNT162b2 or CoronaVac among healthcare  
42 workers in Turkey. *J Med Virol* (2022) doi:10.1002/JMV.27620.
- 43 11. Buonfrate, D. *et al.* Antibody response induced by the BNT162b2 mRNA COVID-19 vaccine in  
44 a cohort of health-care workers, with or without prior SARS-CoV-2 infection: a prospective  
45 study. *Clin Microbiol Infect* **27**, 1845–1850 (2021).
- 46  
47  
48  
49  
50  
51  
52  
53  
54  
55  
56  
57  
58  
59  
60

12. Saadat, S. *et al.* Binding and Neutralization Antibody Titers After a Single Vaccine Dose in Health Care Workers Previously Infected With SARS-CoV-2. *JAMA* **325**, 1467–1469 (2021).
13. Jabal, K. A. *et al.* Impact of age, ethnicity, sex and prior infection status on immunogenicity following a single dose of the BNT162b2 mRNA COVID-19 vaccine: real-world evidence from healthcare workers, Israel, December 2020 to January 2021. *Eurosurveillance* **26**, 2100096 (2021).
14. Lumley, S. F. *et al.* Antibody Status and Incidence of SARS-CoV-2 Infection in Health Care Workers. *New England Journal of Medicine* **384**, 533–540 (2021).
15. Eyre, D. W. *et al.* Quantitative SARS-CoV-2 anti-spike responses to Pfizer–BioNTech and Oxford–AstraZeneca vaccines by previous infection status. *Clinical Microbiology and Infection* (2021) doi:10.1016/J.CMI.2021.05.041.
16. Ainsworth, M. *et al.* Performance characteristics of five immunoassays for SARS-CoV-2: a head-to-head benchmark comparison. *Lancet Infect Dis* **20**, 1390–1400 (2020).
17. Wei, J. *et al.* Antibody responses and correlates of protection in the general population after two doses of the ChAdOx1 or BNT162b2 vaccines. *Nature Medicine* 2022 1–11 (2022) doi:10.1038/s41591-022-01721-6.
18. Gilbert, P. B. *et al.* Immune correlates analysis of the mRNA-1273 COVID-19 vaccine efficacy clinical trial. *Science (1979)* **375**, 43–50 (2022).
19. Feng, S. *et al.* Correlates of protection against symptomatic and asymptomatic SARS-CoV-2 infection. *Nature Medicine* 2021 1–9 (2021) doi:10.1038/s41591-021-01540-1.
20. Carreño, J. M. *et al.* Activity of convalescent and vaccine serum against SARS-CoV-2 Omicron. *Nature* **602**, (2022).
21. Garcia-Beltran, W. F. *et al.* mRNA-based COVID-19 vaccine boosters induce neutralizing immunity against SARS-CoV-2 Omicron variant. *Cell* **185**, 457-466.e4 (2022).
22. Choi, J. H. *et al.* Healthcare Workers in South Korea Maintain a SARS-CoV-2 Antibody Response Six Months After Receiving a Second Dose of the BNT162b2 mRNA Vaccine. *Front Immunol* **13**, 238 (2022).
23. Bertram, S. *et al.* Predictors of impaired SARS-CoV-2 immunity in healthcare workers after vaccination with BNT162b2. *Sci Rep* **12**, 6243 (2022).
24. Boyarsky, B. J. *et al.* Immunogenicity of a Single Dose of SARS-CoV-2 Messenger RNA Vaccine in Solid Organ Transplant Recipients. *JAMA* **325**, 1784–1786 (2021).
25. Shields, A. M. *et al.* Outcomes following SARS-CoV-2 infection in patients with primary and secondary immunodeficiency in the UK. *Clin Exp Immunol* **209**, 247–258 (2022).
26. Turtle, L. *et al.* Outcome of COVID-19 in hospitalised immunocompromised patients: an analysis of the WHO ISARIC CCP-UK prospective cohort study. *medRxiv* 2022.08.08.22278576 (2022) doi:10.1101/2022.08.08.22278576.
27. Davidov, Y. *et al.* A third dose of the BNT162b2 mRNA vaccine significantly improves immune responses among liver transplant recipients. *J Hepatol* (2022) doi:10.1016/J.JHEP.2022.03.042.

- 1
  - 2
  - 3
  - 4
  - 5
  - 6
  - 7
  - 8
  - 9
  - 10
  - 11
  - 12
  - 13
  - 14
  - 15
  - 16
  - 17
  - 18
  - 19
  - 20
  - 21
  - 22
  - 23
  - 24
  - 25
  - 26
  - 27
  - 28
  - 29
  - 30
  - 31
  - 32
  - 33
  - 34
  - 35
  - 36
  - 37
  - 38
  - 39
  - 40
  - 41
  - 42
  - 43
  - 44
  - 45
  - 46
  - 47
  - 48
  - 49
  - 50
  - 51
  - 52
  - 53
  - 54
  - 55
  - 56
  - 57
  - 58
  - 59
  - 60
28. Hod, T. *et al.* BNT162b2 Third Booster Dose Significantly Increases the Humoral Response Assessed by Both RBD IgG and Neutralizing Antibodies in Renal Transplant Recipients. *Transpl Int* **35**, 10239 (2022).
29. Schimpf, J. *et al.* Enhanced SARS-CoV-2 Antibody Response After a Third Heterologous Vector Vaccine Ad26COVS1 Dose in mRNA Vaccine-Primed Kidney Transplant Recipients. *Transplant International* **36**, (2022).
30. Soetedjo, N. N. M., Iryaningrum, M. R., Lawrensia, S. & Permana, H. Antibody response following SARS-CoV-2 vaccination among patients with type 2 diabetes mellitus: A systematic review. *Diabetes Metab Syndr* **16**, (2022).
31. Marfella, R. *et al.* Does poor glycaemic control affect the immunogenicity of the COVID-19 vaccination in patients with type 2 diabetes: The CAVEAT study. *Diabetes Obes Metab* **24**, 160–165 (2022).
32. Klaauw, A. A. van der *et al.* Accelerated waning of the humoral response to SARS-CoV-2 vaccines in obesity. *medRxiv* **7**, 2022.06.09.22276196 (2022).
33. Soegiarto, G. *et al.* Hypertension is associated with antibody response and breakthrough infection in health care workers following vaccination with inactivated SARS-CoV-2. *Vaccine* **40**, 4046–4056 (2022).
34. Moncunill, G. *et al.* Determinants of early antibody responses to COVID-19 mRNA vaccines in a cohort of exposed and naïve healthcare workers. *EBioMedicine* **75**, (2022).
35. Herzberg, J. *et al.* SARS-CoV-2-antibody response in health care workers after vaccination or natural infection in a longitudinal observational study. *Vaccine* **40**, 206–212 (2022).
36. Williamson, E. J. *et al.* Factors associated with COVID-19-related death using OpenSAFELY. *Nature* **584**, 430–436 (2020).
37. Moore, S. C. *et al.* Evolution of long-term hybrid immunity in healthcare workers after different COVID-19 vaccination regimens: a longitudinal observational cohort study. *medRxiv* **28**, 2022.06.06.22275865 (2022).

## Figure legend

**Figure 1. Box and whisker plot of peak anti-spike IgG levels 14-84 days post-second vaccination according to COVID-age score (a) and comorbidities (b).** The number on top of each panel indicates the total number of HCWs in each group. Thyroid disorder excludes malignancy, respiratory disease excludes asthma, haematological disease excludes malignancy, splenic disorder excludes traumatic splenectomy.

For peer review only



1  
2  
3  
4  
5  
6  
7  
8  
9  
10  
11  
12  
13  
14  
15  
16  
17  
18  
19  
20  
21  
22  
23  
24  
25  
26  
27  
28  
29  
30  
31  
32  
33  
34  
35  
36  
37  
38  
39  
40  
41  
42  
43  
44  
45  
46  
47  
48  
49  
50  
51  
52  
53  
54  
55  
56

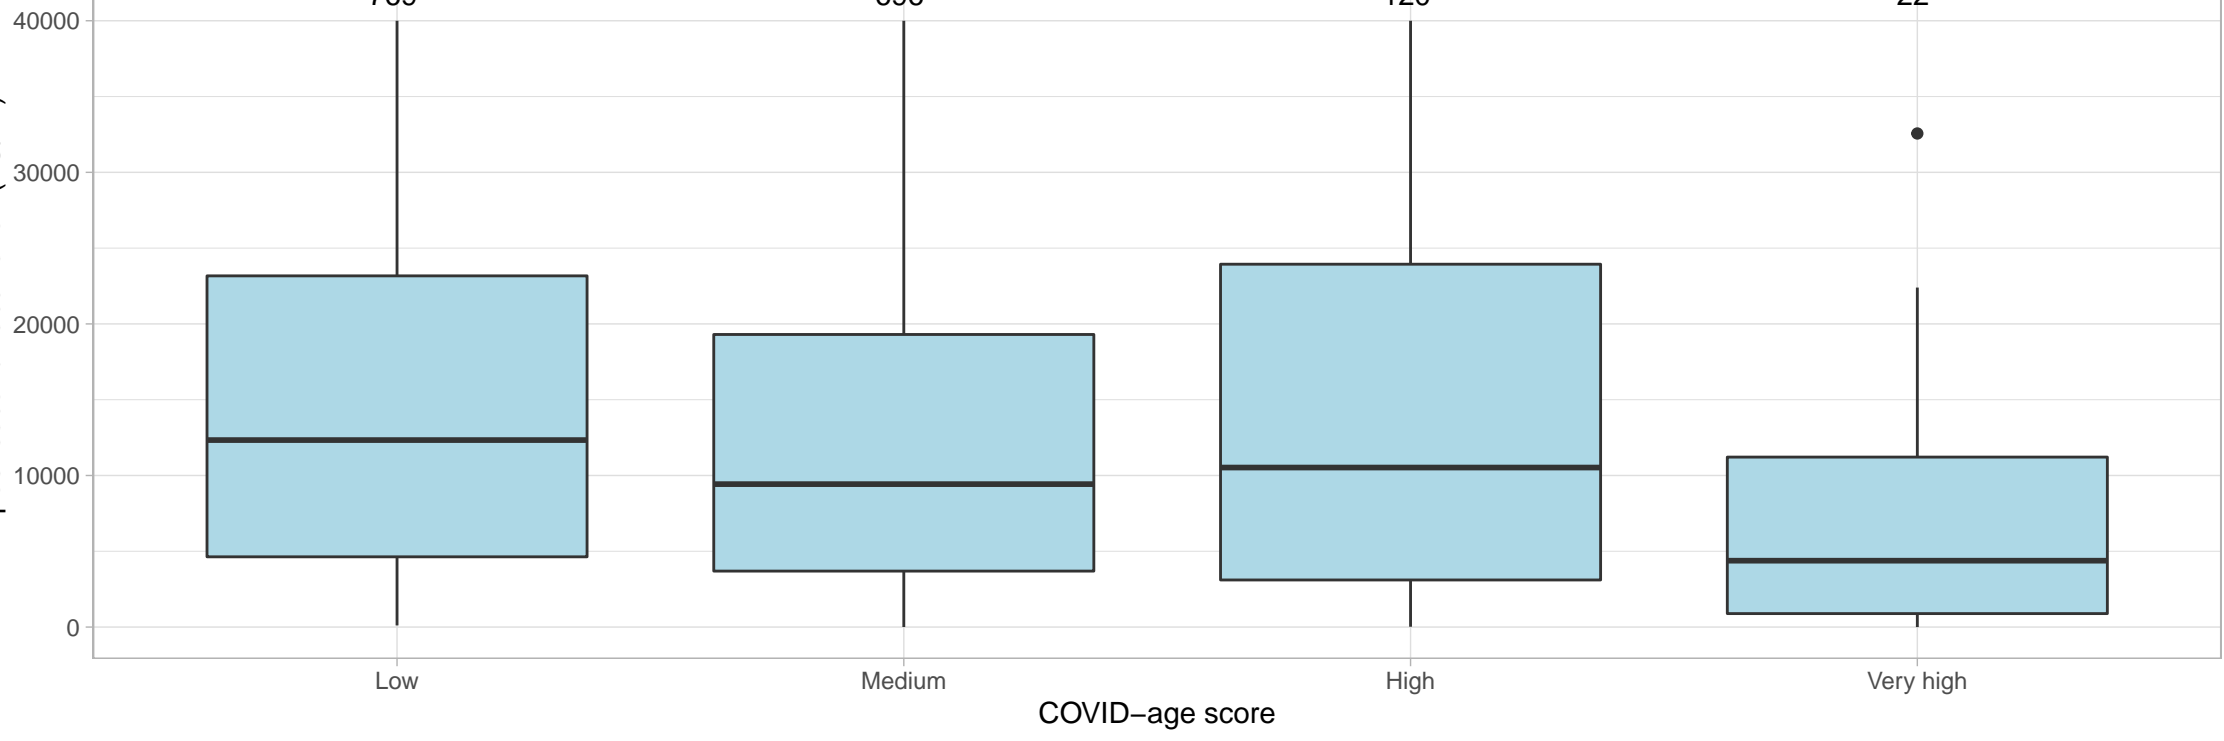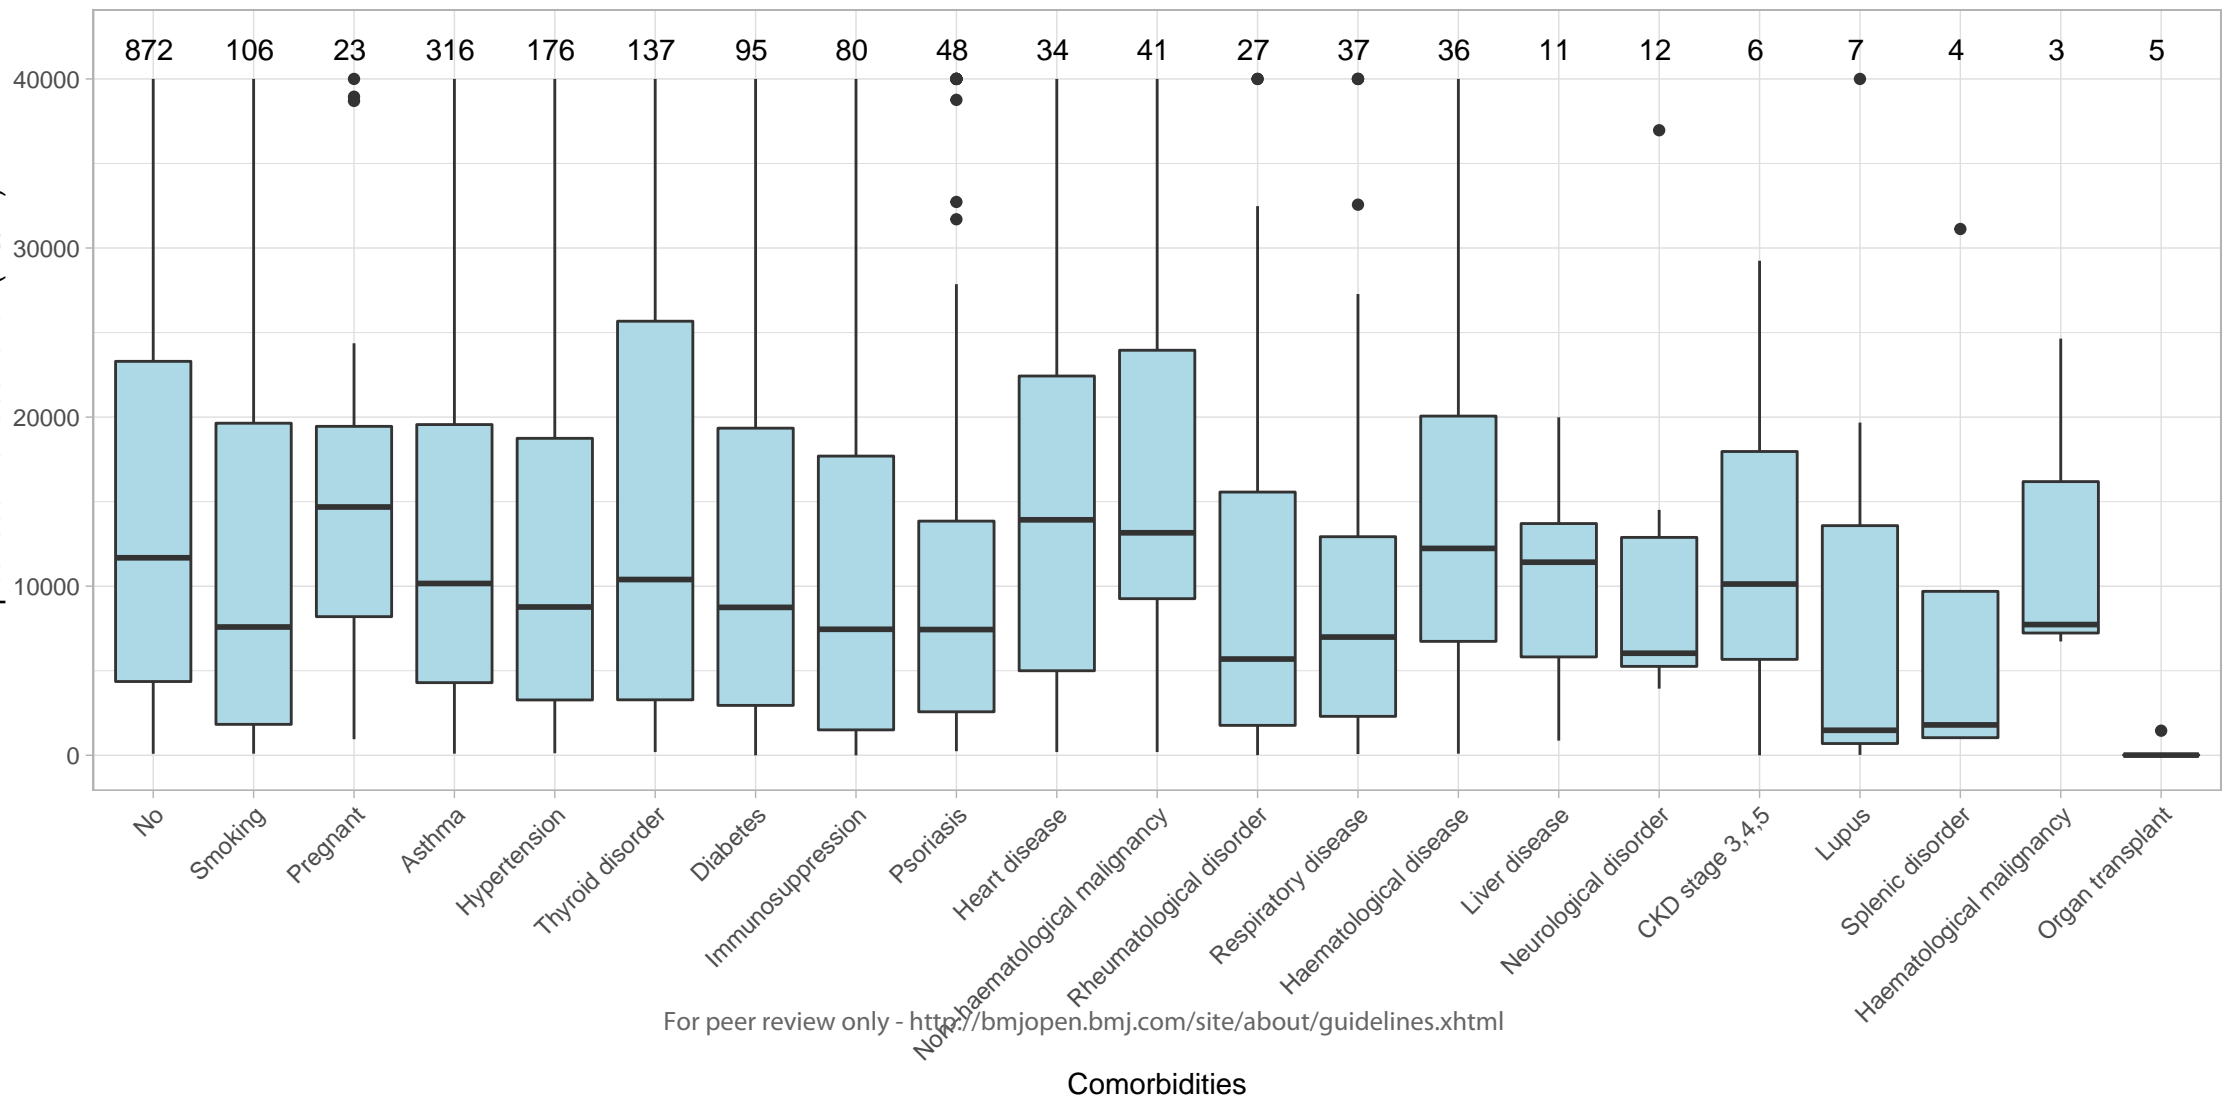

|                                         | Overall (n=5,968) | Included in the analysis (n=1,635) |
|-----------------------------------------|-------------------|------------------------------------|
| <b>Age group</b>                        |                   |                                    |
| 17-34                                   | 2,162 (36.6%)     | 457 (28.0%)                        |
| 35-54                                   | 2,509 (42.5%)     | 723 (44.2%)                        |
| 55-77                                   | 1,232 (20.9%)     | 455 (27.8%)                        |
| <b>Sex</b>                              |                   |                                    |
| Female                                  | 4,594 (77.8%)     | 1,344 (82.2%)                      |
| Male                                    | 1,298 (22.0%)     | 290 (17.7%)                        |
| Other                                   | 11 (0.2%)         | 1 (0.1%)                           |
| <b>Ethnicity</b>                        |                   |                                    |
| White                                   | 3,623 (60.7%)     | 1,169 (71.5%)                      |
| Asian                                   | 1,479 (24.8%)     | 304 (18.6%)                        |
| Black                                   | 339 (5.7%)        | 50 (3.1%)                          |
| Mixed                                   | 137 (2.3%)        | 36 (2.2%)                          |
| Other                                   | 176 (2.9%)        | 55 (3.4%)                          |
| Not stated                              | 214 (3.6%)        | 21 (1.3%)                          |
| <b>Role</b>                             |                   |                                    |
| Administrative Staff                    | 912 (15.4%)       | 245 (15.0%)                        |
| Doctor                                  | 920 (15.6%)       | 106 (6.5%)                         |
| Laboratory Staff                        | 138 (2.3%)        | 61 (3.7%)                          |
| Medical or nursing Student              | 65 (1.1%)         | 12 (0.7%)                          |
| Nurse/HCA                               | 2,602 (44.1%)     | 779 (47.6%)                        |
| Other                                   | 959 (16.2%)       | 331 (20.2%)                        |
| Porter/Domestic                         | 138 (2.3%)        | 31 (1.9%)                          |
| PT/OT/SLT                               | 169 (2.9%)        | 70 (4.3%)                          |
| <b>BMI</b>                              |                   |                                    |
| <16                                     | 11 (0.2%)         | 3 (0.2%)                           |
| 16-24.9                                 | 2,696 (45.2%)     | 698 (42.7%)                        |
| 25-29.9                                 | 1,939 (32.5%)     | 517 (31.6%)                        |
| 30-34.9                                 | 829 (13.9%)       | 261 (16.0%)                        |
| 35-39.9                                 | 295 (4.9%)        | 85 (5.2%)                          |
| 40+                                     | 198 (3.3%)        | 71 (4.3%)                          |
| <b>Comorbidity</b>                      |                   |                                    |
| No                                      | 3,336 (55.9%)     | 872 (53.3%)                        |
| Yes                                     | 2,632 (44.1%)     | 763 (46.7%)                        |
| Smoking                                 | 412 (6.9%)        | 106 (6.5%)                         |
| Pregnant                                | 396 (6.6%)        | 23 (1.4%)                          |
| Asthma                                  | 939 (15.7%)       | 316 (19.3%)                        |
| Hypertension                            | 478 (8.0%)        | 176 (10.8%)                        |
| Thyroid disorder (excluding malignancy) | 390 (6.5%)        | 137 (8.4%)                         |
| Diabetes                                | 314 (5.3%)        | 95 (5.8%)                          |
| Immunosuppression                       | 216 (3.6%)        | 80 (4.9%)                          |
| Psoriasis                               | 146 (2.4%)        | 48 (2.9%)                          |
| Heart disease                           | 117 (2.0%)        | 34 (2.1%)                          |

|                                                    |               |               |
|----------------------------------------------------|---------------|---------------|
| Non-haematological malignancy                      | 112 (1.9%)    | 41 (2.5%)     |
| Rheumatological disorder                           | 111 (1.9%)    | 27 (1.7%)     |
| Respiratory disease (excluding asthma)             | 98 (1.6%)     | 37 (2.3%)     |
| Haematological disease (excluding malignancy)      | 90 (1.5%)     | 36 (2.2%)     |
| Liver disease                                      | 40 (0.7%)     | 11 (0.7%)     |
| Neurological disorder                              | 40 (0.7%)     | 12 (0.7%)     |
| CKD stage 3, 4 or 5                                | 26 (0.4%)     | 6 (0.4%)      |
| Lupus                                              | 20 (0.3%)     | 7 (0.4%)      |
| Splenic disorder (excluding traumatic splenectomy) | 14 (0.2%)     | 4 (0.2%)      |
| Haematological malignancy                          | 12 (0.2%)     | 3 (0.2%)      |
| Organ transplant                                   | 10 (0.2%)     | 5 (0.3%)      |
| <b>Vaccine combination</b>                         |               |               |
| ChAdOx1/ChAdOx1                                    | 678 (23.5%)   | 387 (23.7%)   |
| BNT162b2/BNT162b2                                  | 2,164 (75.2%) | 1,234 (75.5%) |
| Other                                              | 37 (1.3%)     | 13 (0.8%)     |
| <b>COVID-age score</b>                             |               |               |
| Low                                                | 3,433 (59.9%) | 769 (47.9%)   |
| Medium                                             | 1,867 (32.6%) | 696 (43.3%)   |
| High                                               | 366 (6.4%)    | 120 (7.5%)    |
| Very high                                          | 65 (1.1%)     | 22 (1.4%)     |

**Table S1. Comparison of characteristics between the overall population (HCWs with serological data) and the cohort included in the analysis (HCWs with anti-spike IgG measurement 14-84 days post-second vaccination dose). OT/PT/SLT: occupational therapist, physiotherapist, and speech and language therapist. HCA: healthcare assistant.**

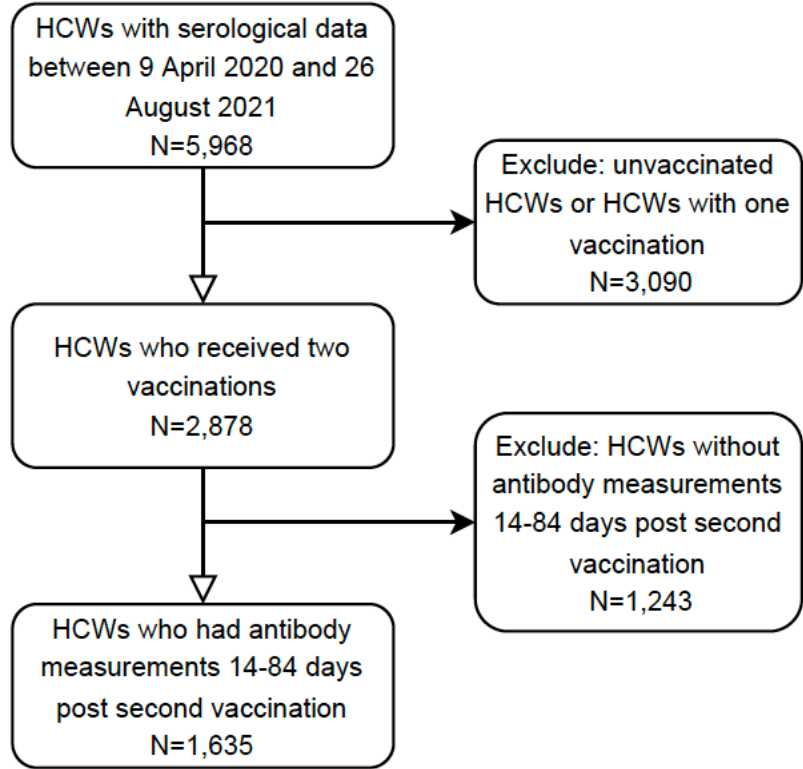

Figure S1. Participants inclusion flowchart.

Review only

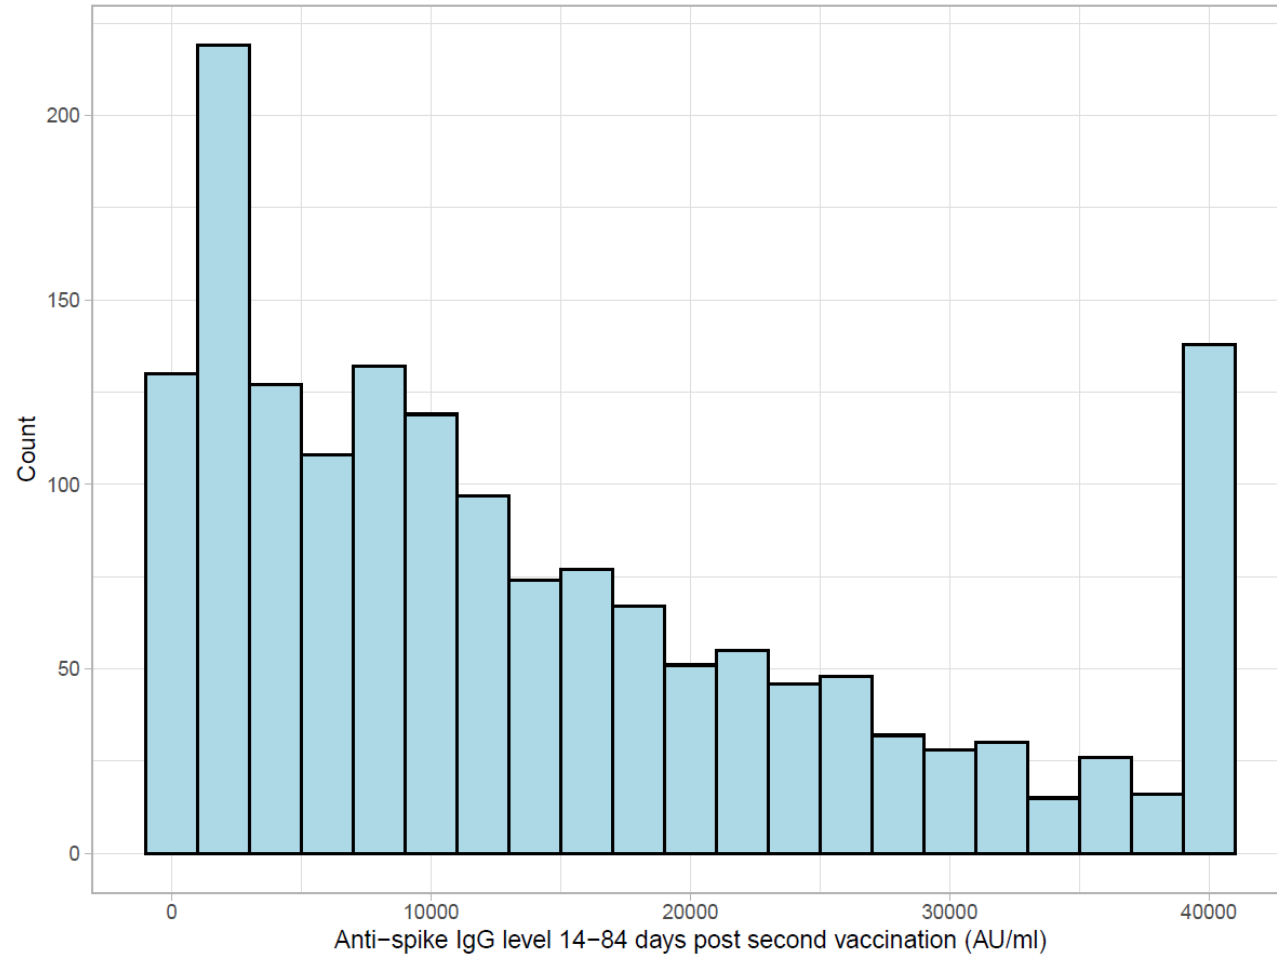

**Figure S2. Distribution of peak anti-spike IgG levels 14-84 days post-second vaccination in 1635 HCWs.**

## STROBE Statement—checklist of items that should be included in reports of observational studies

|                              | Item No | Recommendation                                                                                                                                                                                                                                                                                                                                                                                                                                                         | Page No |
|------------------------------|---------|------------------------------------------------------------------------------------------------------------------------------------------------------------------------------------------------------------------------------------------------------------------------------------------------------------------------------------------------------------------------------------------------------------------------------------------------------------------------|---------|
| <b>Title and abstract</b>    | 1       | (a) Indicate the study's design with a commonly used term in the title or the abstract                                                                                                                                                                                                                                                                                                                                                                                 | 1       |
|                              |         | (b) Provide in the abstract an informative and balanced summary of what was done and what was found                                                                                                                                                                                                                                                                                                                                                                    | 2       |
| <b>Introduction</b>          |         |                                                                                                                                                                                                                                                                                                                                                                                                                                                                        |         |
| Background/rationale         | 2       | Explain the scientific background and rationale for the investigation being reported                                                                                                                                                                                                                                                                                                                                                                                   | 4       |
| Objectives                   | 3       | State specific objectives, including any prespecified hypotheses                                                                                                                                                                                                                                                                                                                                                                                                       | 4       |
| <b>Methods</b>               |         |                                                                                                                                                                                                                                                                                                                                                                                                                                                                        |         |
| Study design                 | 4       | Present key elements of study design early in the paper                                                                                                                                                                                                                                                                                                                                                                                                                | 5       |
| Setting                      | 5       | Describe the setting, locations, and relevant dates, including periods of recruitment, exposure, follow-up, and data collection                                                                                                                                                                                                                                                                                                                                        | 5       |
| Participants                 | 6       | (a) <i>Cohort study</i> —Give the eligibility criteria, and the sources and methods of selection of participants. Describe methods of follow-up<br><i>Case-control study</i> —Give the eligibility criteria, and the sources and methods of case ascertainment and control selection. Give the rationale for the choice of cases and controls<br><i>Cross-sectional study</i> —Give the eligibility criteria, and the sources and methods of selection of participants | 5       |
|                              |         | (b) <i>Cohort study</i> —For matched studies, give matching criteria and number of exposed and unexposed<br><i>Case-control study</i> —For matched studies, give matching criteria and the number of controls per case                                                                                                                                                                                                                                                 | NA      |
| Variables                    | 7       | Clearly define all outcomes, exposures, predictors, potential confounders, and effect modifiers. Give diagnostic criteria, if applicable                                                                                                                                                                                                                                                                                                                               | 6-7     |
| Data sources/<br>measurement | 8*      | For each variable of interest, give sources of data and details of methods of assessment (measurement). Describe comparability of assessment methods if there is more than one group                                                                                                                                                                                                                                                                                   | 6-7     |
| Bias                         | 9       | Describe any efforts to address potential sources of bias                                                                                                                                                                                                                                                                                                                                                                                                              | 7       |
| Study size                   | 10      | Explain how the study size was arrived at                                                                                                                                                                                                                                                                                                                                                                                                                              | 5       |
| Quantitative variables       | 11      | Explain how quantitative variables were handled in the analyses. If applicable, describe which groupings were chosen and why                                                                                                                                                                                                                                                                                                                                           | 6-7     |
| Statistical methods          | 12      | (a) Describe all statistical methods, including those used to control for confounding                                                                                                                                                                                                                                                                                                                                                                                  | 6-7     |
|                              |         | (b) Describe any methods used to examine subgroups and interactions                                                                                                                                                                                                                                                                                                                                                                                                    | 7       |
|                              |         | (c) Explain how missing data were addressed                                                                                                                                                                                                                                                                                                                                                                                                                            | 7       |
|                              |         | (d) <i>Cohort study</i> —If applicable, explain how loss to follow-up was addressed<br><i>Case-control study</i> —If applicable, explain how matching of cases and controls was addressed<br><i>Cross-sectional study</i> —If applicable, describe analytical methods taking account of sampling strategy                                                                                                                                                              | NA      |
|                              |         | (e) Describe any sensitivity analyses                                                                                                                                                                                                                                                                                                                                                                                                                                  | NA      |

Continued on next page

| <b>Results</b>           |     |                                                                                                                                                                                                              |       |
|--------------------------|-----|--------------------------------------------------------------------------------------------------------------------------------------------------------------------------------------------------------------|-------|
| Participants             | 13* | (a) Report numbers of individuals at each stage of study—eg numbers potentially eligible, examined for eligibility, confirmed eligible, included in the study, completing follow-up, and analysed            | 5     |
|                          |     | (b) Give reasons for non-participation at each stage                                                                                                                                                         | NA    |
|                          |     | (c) Consider use of a flow diagram                                                                                                                                                                           | 5     |
| Descriptive data         | 14* | (a) Give characteristics of study participants (eg demographic, clinical, social) and information on exposures and potential confounders                                                                     | 8     |
|                          |     | (b) Indicate number of participants with missing data for each variable of interest                                                                                                                          | 8     |
|                          |     | (c) <i>Cohort study</i> —Summarise follow-up time (eg, average and total amount)                                                                                                                             | NA    |
| Outcome data             | 15* | <i>Cohort study</i> —Report numbers of outcome events or summary measures over time                                                                                                                          | NA    |
|                          |     | <i>Case-control study</i> —Report numbers in each exposure category, or summary measures of exposure                                                                                                         | NA    |
|                          |     | <i>Cross-sectional study</i> —Report numbers of outcome events or summary measures                                                                                                                           | 8     |
| Main results             | 16  | (a) Give unadjusted estimates and, if applicable, confounder-adjusted estimates and their precision (eg, 95% confidence interval). Make clear which confounders were adjusted for and why they were included | 8-15  |
|                          |     | (b) Report category boundaries when continuous variables were categorized                                                                                                                                    | 8-15  |
|                          |     | (c) If relevant, consider translating estimates of relative risk into absolute risk for a meaningful time period                                                                                             | NA    |
| Other analyses           | 17  | Report other analyses done—eg analyses of subgroups and interactions, and sensitivity analyses                                                                                                               | NA    |
| <b>Discussion</b>        |     |                                                                                                                                                                                                              |       |
| Key results              | 18  | Summarise key results with reference to study objectives                                                                                                                                                     | 16-17 |
| Limitations              | 19  | Discuss limitations of the study, taking into account sources of potential bias or imprecision. Discuss both direction and magnitude of any potential bias                                                   | 17    |
| Interpretation           | 20  | Give a cautious overall interpretation of results considering objectives, limitations, multiplicity of analyses, results from similar studies, and other relevant evidence                                   | 17-18 |
| Generalisability         | 21  | Discuss the generalisability (external validity) of the study results                                                                                                                                        | 17    |
| <b>Other information</b> |     |                                                                                                                                                                                                              |       |
| Funding                  | 22  | Give the source of funding and the role of the funders for the present study and, if applicable, for the original study on which the present article is based                                                | 19    |

\*Give information separately for cases and controls in case-control studies and, if applicable, for exposed and unexposed groups in cohort and cross-sectional studies.

**Note:** An Explanation and Elaboration article discusses each checklist item and gives methodological background and published examples of transparent reporting. The STROBE checklist is best used in conjunction with this article (freely available on the Web sites of PLoS Medicine at <http://www.plosmedicine.org/>, Annals of Internal Medicine at <http://www.annals.org/>, and Epidemiology at <http://www.epidem.com/>). Information on the STROBE Initiative is available at [www.strobe-statement.org](http://www.strobe-statement.org).
