# Supplementary material for: SARS-CoV-2 antibody responses post-vaccination in UK healthcare workers with pre-existing medical conditions: a cohort study
Source: PubMed Central journal article supplement — BMJ Open. 2022 Dec 1;12(12):e066766. doi: 10.1136/bmjopen-2022-066766 (PMC9716410; doi:10.1136/bmjopen-2022-066766), 2022-12-01
Supplement: bmjopen-2022-066766supp001.pdf [file bmjopen-2022-066766supp001.pdf]

|                                         | Overall (n=5,968) | Included in the analysis (n=1,635) |
|-----------------------------------------|-------------------|------------------------------------|
| <b>Age group</b>                        |                   |                                    |
| 17-34                                   | 2,162 (36.6%)     | 457 (28.0%)                        |
| 35-54                                   | 2,509 (42.5%)     | 723 (44.2%)                        |
| 55-77                                   | 1,232 (20.9%)     | 455 (27.8%)                        |
| <b>Sex</b>                              |                   |                                    |
| Female                                  | 4,594 (77.8%)     | 1,344 (82.2%)                      |
| Male                                    | 1,298 (22.0%)     | 290 (17.7%)                        |
| Other                                   | 11 (0.2%)         | 1 (0.1%)                           |
| <b>Ethnicity</b>                        |                   |                                    |
| White                                   | 3,623 (60.7%)     | 1,169 (71.5%)                      |
| Asian                                   | 1,479 (24.8%)     | 304 (18.6%)                        |
| Black                                   | 339 (5.7%)        | 50 (3.1%)                          |
| Mixed                                   | 137 (2.3%)        | 36 (2.2%)                          |
| Other                                   | 176 (2.9%)        | 55 (3.4%)                          |
| Not stated                              | 214 (3.6%)        | 21 (1.3%)                          |
| <b>Role</b>                             |                   |                                    |
| Administrative Staff                    | 912 (15.4%)       | 245 (15.0%)                        |
| Doctor                                  | 920 (15.6%)       | 106 (6.5%)                         |
| Laboratory Staff                        | 138 (2.3%)        | 61 (3.7%)                          |
| Medical or nursing Student              | 65 (1.1%)         | 12 (0.7%)                          |
| Nurse/HCA                               | 2,602 (44.1%)     | 779 (47.6%)                        |
| Other                                   | 959 (16.2%)       | 331 (20.2%)                        |
| Porter/Domestic                         | 138 (2.3%)        | 31 (1.9%)                          |
| PT/OT/SLT                               | 169 (2.9%)        | 70 (4.3%)                          |
| <b>BMI</b>                              |                   |                                    |
| <16                                     | 11 (0.2%)         | 3 (0.2%)                           |
| 16-24.9                                 | 2,696 (45.2%)     | 698 (42.7%)                        |
| 25-29.9                                 | 1,939 (32.5%)     | 517 (31.6%)                        |
| 30-34.9                                 | 829 (13.9%)       | 261 (16.0%)                        |
| 35-39.9                                 | 295 (4.9%)        | 85 (5.2%)                          |
| 40+                                     | 198 (3.3%)        | 71 (4.3%)                          |
| <b>Comorbidity</b>                      |                   |                                    |
| No                                      | 3,336 (55.9%)     | 872 (53.3%)                        |
| Yes                                     | 2,632 (44.1%)     | 763 (46.7%)                        |
| Smoking                                 | 412 (6.9%)        | 106 (6.5%)                         |
| Pregnant                                | 396 (6.6%)        | 23 (1.4%)                          |
| Asthma                                  | 939 (15.7%)       | 316 (19.3%)                        |
| Hypertension                            | 478 (8.0%)        | 176 (10.8%)                        |
| Thyroid disorder (excluding malignancy) | 390 (6.5%)        | 137 (8.4%)                         |
| Diabetes                                | 314 (5.3%)        | 95 (5.8%)                          |
| Immunosuppression                       | 216 (3.6%)        | 80 (4.9%)                          |
| Psoriasis                               | 146 (2.4%)        | 48 (2.9%)                          |
| Heart disease                           | 117 (2.0%)        | 34 (2.1%)                          |

|                                                           |               |               |
|-----------------------------------------------------------|---------------|---------------|
| <b>Non-haematological malignancy</b>                      | 112 (1.9%)    | 41 (2.5%)     |
| <b>Rheumatological disorder</b>                           | 111 (1.9%)    | 27 (1.7%)     |
| <b>Respiratory disease (excluding asthma)</b>             | 98 (1.6%)     | 37 (2.3%)     |
| <b>Haematological disease (excluding malignancy)</b>      | 90 (1.5%)     | 36 (2.2%)     |
| <b>Liver disease</b>                                      | 40 (0.7%)     | 11 (0.7%)     |
| <b>Neurological disorder</b>                              | 40 (0.7%)     | 12 (0.7%)     |
| <b>CKD stage 3, 4 or 5</b>                                | 26 (0.4%)     | 6 (0.4%)      |
| <b>Lupus</b>                                              | 20 (0.3%)     | 7 (0.4%)      |
| <b>Splenic disorder (excluding traumatic splenectomy)</b> | 14 (0.2%)     | 4 (0.2%)      |
| <b>Haematological malignancy</b>                          | 12 (0.2%)     | 3 (0.2%)      |
| <b>Organ transplant</b>                                   | 10 (0.2%)     | 5 (0.3%)      |
| <b>Vaccine combination</b>                                |               |               |
| <b>ChAdOx1/ChAdOx1</b>                                    | 678 (23.5%)   | 387 (23.7%)   |
| <b>BNT162b2/BNT162b2</b>                                  | 2,164 (75.2%) | 1,234 (75.5%) |
| <b>Other</b>                                              | 37 (1.3%)     | 13 (0.8%)     |
| <b>COVID-age score</b>                                    |               |               |
| <b>Low</b>                                                | 3,433 (59.9%) | 769 (47.9%)   |
| <b>Medium</b>                                             | 1,867 (32.6%) | 696 (43.3%)   |
| <b>High</b>                                               | 366 (6.4%)    | 120 (7.5%)    |
| <b>Very high</b>                                          | 65 (1.1%)     | 22 (1.4%)     |

**Table S1. Comparison of characteristics between the overall population (HCWs with serological data) and the cohort included in the analysis (HCWs with anti-spike IgG measurement 14-84 days post-second vaccination dose).** OT/PT/SLT: occupational therapist, physiotherapist, and speech and language therapist. HCA: healthcare assistant.

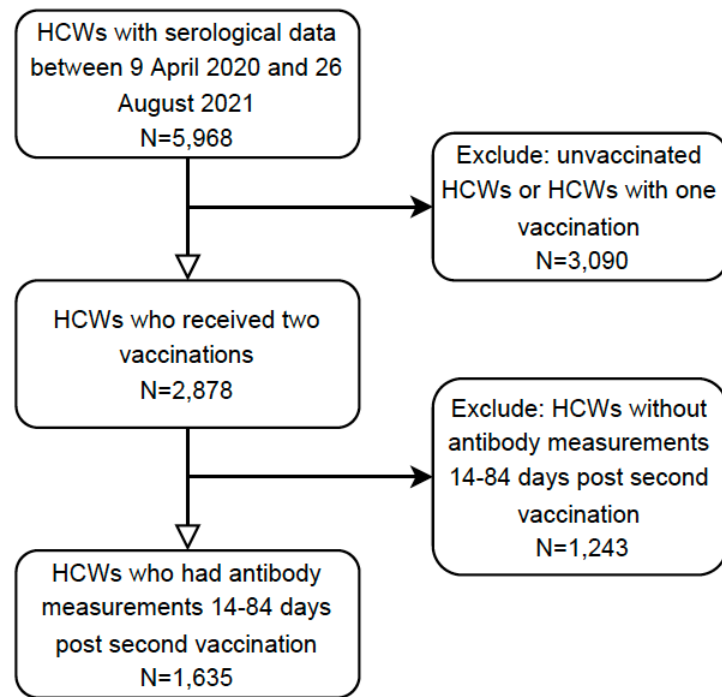

Figure S1. Participants inclusion flowchart.

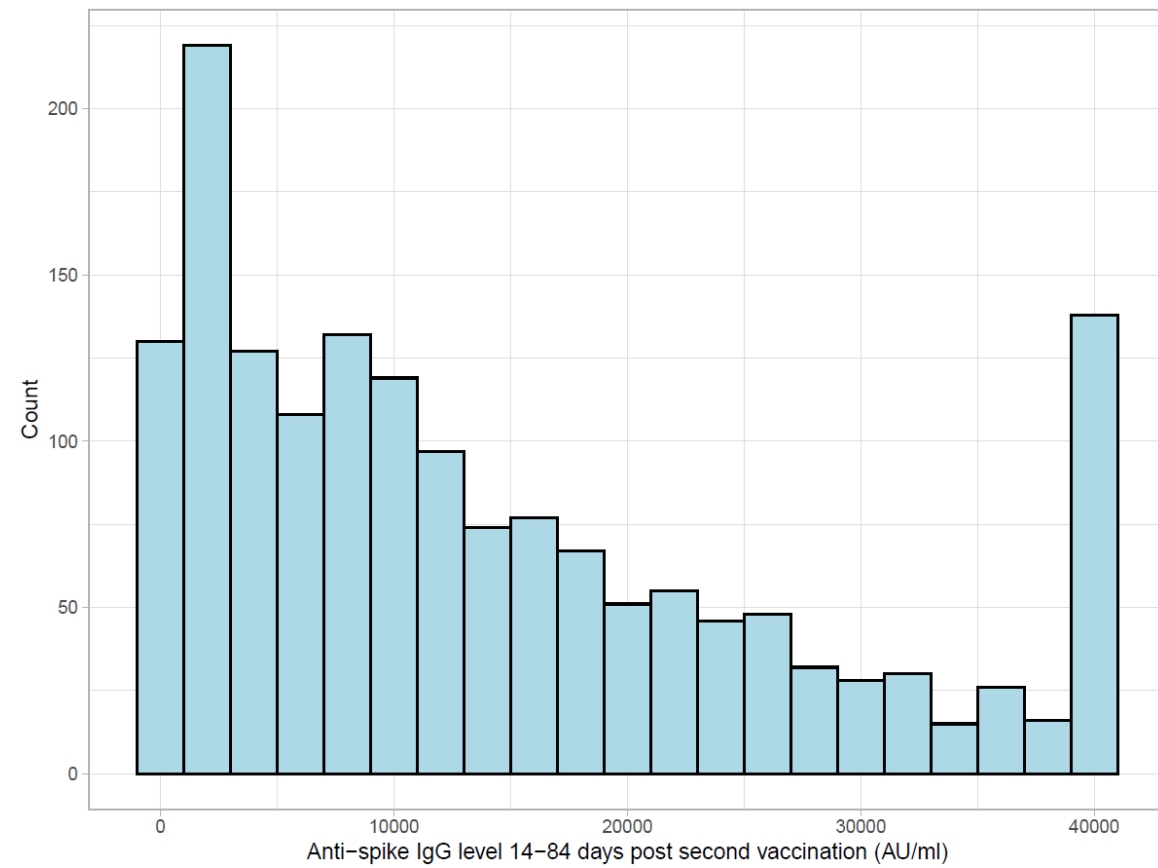

**Figure S2. Distribution of peak anti-spike IgG levels 14-84 days post-second vaccination in 1635 HCWs.**
